# Supplementary material for: Effectiveness of Using AI Driven Hotspot Mapping for Active Case Finding of Tuberculosis in South-Western Nigeria
Source: Preprints.org preprint supplement (doi:10.20944/preprints202403.0091.v2), 2024-03-28
Supplement: Supplementary file 1 [file supplementary]

## Sheet: SupplementaryData1
wardcode	ward_name	pred_bpos	pred_pos
LASEOA01	1004/Aboyade	0.012389841447000916336475	0.012960068253930413487141
ANSATN01	A Ozizor	0.015545015822853289288889	0.016680766845889883587302
OSSBOE01	Aagba	0.014898542914573971414182	0.015209346610062527945362
OYSOGN01	Aaje/Ogunbado	0.013294086875648893849340	0.014165961287828163872149
EKSIDO02	Aaye-Ifisin	0.015264602371743412675045	0.015501905558046353326750
ABSABA01	Aba River	0.015960561906904344070523	0.014692160553568178238083
ABSABA02	Aba Town Hall	0.016052382752784921153176	0.014231285704095264435402
CRSBRA10	Ababene	0.014933979256831376867430	0.015382449941179285548282
ANSGDD01	Abacha	0.015545951525792047797504	0.015541438160235024000000
40301	Abadau Kagara	0.014654708084621520762864	0.016448435238113849369558
KD1701	Abadawa	0.013765972181648230036660	0.014991598653953053996336
ANSABN01	Abagana 1	0.015955033676687575768240	0.015075565804190872185776
ANSABN02	Abagana 2	0.015705508708248878888889	0.014964237258008095265700
ANSABN03	Abagana 3	0.015601017370697852206874	0.014897723535362967623865
ANSABN04	Abagana Iv	0.015623738779872543000000	0.015158487561642158000000
IMSAMG01	Abajah 1	0.016079463053437147930236	0.015718114300721307537466
IMSAMG02	Abajah 2	0.015944458963945085594053	0.015868776188806030990827
AKSABK04	Abak 1	0.016098670515115636684141	0.016220663313664590035652
AKSABK03	Abak 2	0.015765907509615149740870	0.016004995348536822068864
AKSABK09	Abak 3	0.015871705670839954016830	0.015963083506200385298043
AKSABK10	Abak 4	0.016030100690767892105515	0.016019004077272232417473
AKSKTM12	Abak Midim 1	0.016055116222072581568462	0.016998226798559801928595
AKSKTM04	Abak Midim 2	0.015970175249906893782082	0.016323442483472146388609
AKSKTM02	Abak Midim 4	0.015523976499592032667511	0.016140882420015517670886
EBSAKL01	Abakpa	0.014795174960171076000000	0.015094662461876681000000
EBSUGB01	Abakpa	0.014735991830192401000000	0.014775536963049292000000
ENSNKW09	Abakpa 1	0.015761565568175558747440	0.014923022228484145518700
ENSNKW06	Abakpa 2	0.016154320934945397898496	0.014559460586122788845797
OGSEWO01	Abalabi	0.013350519229802594192422	0.014483736310317209507765
DTSABH01	Aballa/Inyi/Onuaboh	0.013293358968516979073196	0.015080736364985287575294
CRSBKS06	Abana	0.01520138036516254316087	0.01656610067468052417442
OYSOYE01	Abanla	0.014631001525971185435444	0.015731804795886474830042
EBSNCA01	Abaomege	0.015197129905432308090389	0.015396574261733945597507
LASAMO01	Abaranje/Okerube	0.016138865147940631723775	0.014855813891741174926574
DTSPTN01	Abari	0.015770560843394626396156	0.016821498863654687481837
ANSGDD02	Abatete	0.015496999343969655655949	0.015148021066182224472669
KWSBDU01	Abati Alara	0.014479758394788497190104	0.015003328749817320646424
DTSAGB01	Abavo Central	0.016572635746680209318279	0.016991548777999972247976
JI0601	Abaya	0.013557236514060642118169	0.014657313348733047582136
ABSNGK02	Abayi 1	0.01612826337355499331593	0.016052038958358845000000
ABSNGK03	Abayi 2	0.016031973162478695359482	0.016002318897777386500254
ABSGWB01	Abayi Mbasaa	0.015917019743546017838126	0.016272817857633518874588
CRSKMM10	Abayom	0.0136970417142205645579534089249628	0.0149050090982244103105870939834993
CRSAKP11	Abayong	0.015167167596791993597699	0.016153207473174627403625
IMSAMG04	Abba 1	0.016272269494016379414612	0.015809785227975967539837
ANSABN06	Abba 2	0.015402008111846584576602	0.014803627118377832250696
ANSABN05	Abba I	0.015579059025619866363636	0.014742993730362544944664
PLSJJN01	Abba Nashehu	0.0157421050398299000000	0.01566908835976598000000
10301	Abbaram	0.012547397146909972444029	0.014392355337405704660605
TRSLAU01	Abbare	0.014678371760069102746699	0.016068972148092542696279
ENSUMU06	Abbi	0.015150273740043133000000	0.015541438160235024000000
DTSKWC01	Abbi 8	0.0153162395247127958597194388777555	0.0162040765707594431382765531062124
DTSKWC02	Abbi 9	0.0158305406996011639930611586251412	0.0165143460832859064106825883492012
41801	Abdallawa	0.0155388379635289064153529814941741	0.0171108619293825760095956134338588
BA1004	Abdallawa	0.012475287551116018998748	0.014269762711083748397449
OYSINW01	Abebi	0.016097203819701957000000	0.014903187162580246000000
KGSBJK01	Abejukolo 1	0.014548748016675099353498	0.015138992068136496890217
KGSBJK02	Abejukolo 2	0.013370777242153668462854	0.014837923216696862962956
DTSSAP01	Abeke	0.015312173564220692126189	0.015946162952660374760304
LASAMO02	Abesan 1	0.015406811638100308984252	0.014060896869612210551181
LASAMO03	Abesan 2	0.013697545672488631043290	0.013246552819836303061472
LASAPA01	Abete	0.015564555649893869000000	0.013818160466567125000000
CRSEFE07	Abia	0.01279991681918913093794	0.013609009970110963315985
ENSUDD01	Abia	0.015091801682790633341035	0.01592438875882789000000
DTSKLK01	Abigborodo	0.013030449277779188721393	0.013753881741359108296375
OGSWSD01	Abigi	0.0117606925261283841465360899528473	0.0122298947358416534029742473703301
CRSEFE10	Abijan	0.01296049793083211000000	0.015286137761173112000000
EBSCHR01	Abina	0.014695854183924440825168	0.015362776929959710257445
BNSYGJ01	Abinsi	0.015088726786825664905695	0.016023808625770268709320
EDSABD06	Abiokula 1 And 2	0.015139405985543590606670	0.015899420566905385250751
OSSISO01	Abiri	0.013550388800127770320843	0.014146104890186465648712
OSSISH01	Abiri Ogudu	0.014262526790362991000000	0.014967012262345723000000
CRSBJE05	Abo	0.013353983309835271097605	0.014280881978491806201704
KGSKNA01	Abocho	0.013707096620436208031514	0.014978432743395131045368
EBSUGB02	Abofia	0.014823231516025519728386	0.015316394905010062714697
OYSOGN02	Abogunde	0.011533955961625722275632	0.012309644460126073885486
DTSABH02	Aboh/Akarai	0.014280914679302499720791	0.015421029111757347729378
OYSOSO01	Aboke	0.009384940764394505937731	0.010459814019356654278505
TRSKRM01	Abong	0.011593951675599868871313	0.013373289283091002189854
ENSUDD02	Abor	0.015408437026164960226172	0.015314385354155255802734
OYSIBE01	Aborerin	0.012842131670874758000000	0.012924609069850438000000
KD2001	Aboro	0.014635694012159570008655	0.015720042673769347519638
LASAMO04	Aboru	0.013991332570876386924690	0.013109729577696143134039
LASIKU01	Abosan	0.015903406032524011593647	0.015797503152238775296094
KWSAFN01	Aboto/Odoode	0.01088908838157844000000	0.01145663177524445000000
RVSABU01	Aboward 1	0.015662862883504632320719	0.015645076467048316734768
RVSABU10	Aboward 10	0.015198853051786158150352	0.015742662466536656971163
RVSABU11	Aboward 11	0.015379529527884483334909	0.015907413567306931986954
RVSABU12	Aboward 12	0.015312627254467834753234	0.016310637075804336003875
RVSABU13	Aboward 13	0.014804793949234766905751	0.015997990917856741942388
RVSABU02	Aboward 2	0.015669070539005147437943	0.016128991206303038861702
RVSABU03	Aboward 3	0.015480691139785136582293	0.015613949188230234543331
RVSABU04	Aboward 4	0.015787963022839257192017	0.015244975301124278660501
RVSABU05	Aboward 5	0.015523705341322727272727	0.016473671435597457380471
RVSABU06	Aboward 6	0.016398664617953727415927	0.017100461092540847031150
RVSABU07	Aboward 7	0.015271729882288529638554	0.015972065339375597028112
RVSABU08	Aboward 8	0.016166713152064549573529	0.016707441906814875411603
RVSABU09	Aboward 9	0.015245164436960926912317	0.015885480764816367027140
LASAPA02	Abraham Adesanya	0.015655767192776067049055	0.015066174973402239891639
DTSSKL01	Abraka	0.015397815574224743328267	0.015983589338963848369093
IMSIHI01	Abueke	0.016062190140655444784883	0.016077481787136638080387
KGSKNE01	Abuga/Ozuja	0.015353347654762134312392	0.015267198187021772940876
43001	Abukur	0.014919006886932719693969	0.015367298631155195226985
LASAMO05	Abule Egba	0.017048486980888244820736	0.014823974539678292831975
LASIOE01	Abule Egba/Ilupeju	0.017083111830570880290687	0.014971172386450814802485
LASLMD01	Abule Ijesha	0.011882985856202545832740	0.012171427465500529629893
LASLMD02	Abule Oja	0.014024321690359915111359	0.013534368706852642263285
LASAON01	Abule Osun Onireke	0.016050703375731200787509	0.015429325674095969645940
JI1001	Abunabo	0.011287587988512668650834	0.013811104994209843671412
CRSABE06	Abuochiche	0.015169349653450357206314	0.015419177010977953425844
KGSAJA01	Achagana	0.014262526790362991000000	0.014711711863283815000000
ANSACA02	Achalla 2	0.015268640000000486000000	0.016007039967157285726619
ANSACA01	Achalla I	0.01296049793083211000000	0.013754335366801648000000
AKSNYA03	Achan 1	0.015852612695787597118180	0.016054289058052387201573
AKSNYA02	Achan 2	0.016095646368913043078947	0.016193126020998322894737
AKSNYA08	Achan 3	0.015852152310092051242433	0.016015469879419764449806
ABSMBL02	Achara	0.015482323130738847735969	0.015774146124931320519387
EBSBZR01	Achara	0.015030260235911423705765	0.015906878095273943268390
IMSTTK01	Achara	0.015876303729463075222930	0.015895321914030235642251
ENSUWN04	Achara 1	0.016030679058383754353806	0.014621737762575587921644
ENSUWN08	Achara 2	0.016176701900199128234356	0.014387744278145861659665
ENSUWN11	Achara 3	0.015695013086943639897849	0.014731099595201822400538
ENSJRV19	Achi-Agu 1	0.015268640000000486000000	0.015541438160235024000000
ENSJRV09	Achi-Agu 2	0.016092262087178886596421	0.016310004023613749081511
ENSJRV01	Achi-Agu 3	0.015734272162406249373590	0.016164649973686291333038
ENSJRV04	Achi-Uno 1	0.015214241930555131028200	0.015677485976839213944957
ENSJRV07	Achi-Uno 2	0.015390355416978226276992	0.015470151749476859112435
ENSJRV03	Achi-Uno 3	0.015513391360858327610491	0.015450556703804125923602
ENSJRV08	Achi-Uno 4	0.015053622683249599383085	0.015801501626443611409204
EBSEBJ01	Achiagu Ogboji	0.015429012413579816177213	0.015669838557210992508880
62201	Achida	0.014780111878736545854942	0.014435385129548897129649
KN4401	Achika	0.013664665160843946412458	0.014358688879026519305457
JI2701	Achilafiya	0.013138854050477151023306	0.014180207014955007582648
ANSAGU01	Achina 1	0.015101270531682713559448	0.015939833748281057975512
ANSAGU02	Achina 2	0.015712942338101273817029	0.015367884763952447135870
ENSUMU01	Adaba/Nkume	0.013814134588032558103148	0.015282370602281089903908
80401	Adabka	0.010760294324810916352391	0.013442773341335241676195
OYSSWT01	Adabo	0.010833896513606944446248	0.011670853037745740605364
EDSFUG01	Adachi	0.015059987067301941569343	0.015961503597864263060827
CRSTGD05	Adadama	0.015944609262773726465298	0.015928389086372772072014
BYSSAG01	Adagbabiri	0.014829704722031988100855	0.015548073956848713418661
DTSKPE01	Adagbarassa	0.0153278231299791640000000000000000	0.0161796891578898020000000000000000
NISAGR01	Adahe	0.012990273285441855539218	0.014899959087033974840450
51601	Adai	0.011455352176623173004422	0.012215317807752438769762
KN0701	Adakawa	0.015380160504063026929394	0.014232979117364941204419
ENSUMU09	Adani	0.013861594989414484922832	0.014726724307888297568976
ADSYLA01	Adarawo	0.015492686010025808475478	0.015645823190933797826516
KGSDAV01	Adavi-Eba	0.015124803986676545146389	0.015499205786999751862179
ANSNEN03	Adazi Ani 1	0.015694395946739469031237	0.014917567747331920278517
ANSNEN04	Adazi Ani 2	0.016296296859462858456067	0.015299223241878169560669
ANSNEN05	Adazi Enu 1	0.015567834715203498138514	0.014635854869711196265541
ANSNEN01	Adazi Enu 2	0.016108946052072821912766	0.014967918767382661956053
ANSNEN06	Adazi Nnukwu 1	0.01568292190985122000000	0.015477613060469547000000
ANSNEN02	Adazi Nnukwu 2	0.015711305655861403734694	0.015027201068161979246599
LASEOA02	Addo/Okeira	0.016047975186867837154265	0.015945609741708600007682
KGSLAM01	Adeh 1	0.013848269070828202485531	0.014719693261711905787403
DTSKPE02	Adeje	0.014687899740559426353854	0.015853860426953258097233
LASLMD03	Adekunle/Aiyetoro	0.015508628849598033192566	0.014037520882011971433855
KWSKMA01	Adena	0.012750864440069867666039	0.013094032998372104699750
LASSUE01	Adeniran Ogunsanya	0.015539167595979351829590	0.013784071877446150745572
LASLMD04	Aderupoko/Ijebu Qters	0.014428859836952411699992	0.013579174699893127002475
OYSISE01	Adesola	0.016177917302606611701516	0.014824052554271603743231
OSSIEW01	Adeti	0.00929114387215418000000	0.010243954879700375000000
KWSLRN01	Adewole	0.015621855183946101166052	0.015652013379201414852399
CRSDUK07	Adiabo Efut	0.015890610512997470714093	0.015986812463382865406985
AKSAFH06	Adiasin	0.01629507100748926254249	0.016798501919858014871516
BNSBRT01	Adiko	0.015199609106142812119086	0.016324414914291129472268
CRSAKP03	Adim	0.014738948442609457617877	0.015626592751488579417695
JI1002	Adiyani	0.013264187817695789804124	0.013915310204728517897444
OGSADO01	Ado 1	0.013037730862373680186121	0.013833923676260095457295
OGSADO02	Ado 2	0.016005894492977716924568	0.016878728107453750741981
OYSISN01	Ado Awaye	0.010461526942539231629254	0.011498815867442651586310
LASAON02	Ado Soba	0.013628396752958014685647	0.013410376377199553769276
NASLFA01	Adogi	0.013304344118695822743477	0.014976971022422796967709
KGSAJA02	Adogo	0.014144160530405635000000	0.014584061663752857000000
KGSAJA03	Adogwu/Ogodo/Ohuovene	0.011292150498218681026994	0.011623907461534073349736
BNSTKP01	Adoka Ehaje	0.014207103812915354487776	0.015409324144352822766514
BNSTKP02	Adoka Icho	0.014721272991598061155260	0.015790055723201714196340
BNSJUX01	Adokpa	0.013729878620554904000000	0.01541378796070407000000
EDSAKA11	Adolor	0.0155266952129791350468261681078625	0.0156784732246100602847494994542559
NISPAK01	Adono	0.014060703001464900157848	0.015428788533538315737494
DTSGWK01	Adonte	0.01448583230061292774890	0.01569130061915572840088
NASNBB01	Adudu	0.013306986373707849674622052879913	0.014623516503532167687521392417106
BNSBRT02	Adum East	0.015142450682632159080460	0.016266623345501399971264
11001	Aduwa	0.012712356986232383463457	0.014008608096672851640733
CRSTGD08	Afafanyi	0.015787412913994149754173	0.015785213237791485034901
AKSAFH08	Afaha	0.016052557722444591734499	0.016444933690142517236884
AKSABK08	Afaha Obong 1	0.016017731017565377984661	0.016004745645202288405281
AKSABK07	Afaha Obong 2	0.016191878533037239709428	0.016205238927347697539413
KD0401	Afaka	0.014682535229063478030136	0.015357672657112025214803
EKSIPN01	Afao	0.01372987862055490400000	0.01458406166375285700000
EKSIKR01	Afao/Kajola	0.013493146100640199000000	0.01534996286093859000000
RVSKHE14	Afara	0.016094242090921642929909	0.016345275908698026349152
IMSNWA01	Afara/Eziama	0.016000458958844906952721	0.015866690315235323228470
ABSUMA01	Afaraukwu	0.016046071534065236916288	0.015687324102556116341674
LASOIO01	Afariogun	0.014334693114097672310541	0.013836617012510704905983
ODSANW01	Affa/Aje/Ido	0.015321332077013758371613	0.015764373057093280481290
ENSUDD03	Affa/Oghu	0.015298160825217744302879	0.015885556068067887077868
DTSUGH01	Afiesere/Ereumukohwaren	0.015797618524297745093923	0.015763833608685930043713
OYSATA01	Afin 1	0.014847566382835049234412	0.015559374678284276577584
OYSATA02	Afin Ii	0.014958500468503488872930	0.014947879241593604488086
ODSOSE01	Afo	0.013868076488911956818302	0.014950457233176798508887
KD1201	Afogo	0.013036749483894385934374	0.014458200106606249333452
EDSAGD09	Afokpella	0.013908905982249356709012	0.015055681334169751916124
KWSAFN02	Afon	0.012368666631045348000000	0.013116084369146873000000
OGSION01	Afon	0.01041562334174903000000	0.01145663177524445000000
OYSINW02	Afonta	0.013861732835587268048988	0.013451930820628474845935
DTSABH03	Afor/Obikwele	0.0152099400397948551262257948355137	0.0160784915766221218122359794021104
EDSGUE10	Afuda	0.015506962264688416967012	0.015607669484308341752121
ABSUMA02	Afugiri 1	0.01586047129978725000000	0.01592438875882789000000
ABSUMA03	Afugiri 2	0.015696997917156742951750	0.015806858589232247980743
71301	Afunori	0.012270998053731881537389	0.013622716692835007455969
10801	Afuye	0.013396884383205000554217	0.014170351980935666566265
LASIKU02	Aga/Ijomu	0.015647434444999711030086	0.015328276023967993659373
OGSIKA01	Agada	0.0139641725113556494142449798555639	0.0151654505258585642383384323494052
EBSUGB03	Agalegu 1	0.013960392310127474041900	0.014833038060074332661775
EBSUGB04	Agalegu 2	0.013688668341955135894025	0.014203001616517067250802
BNSMKD01	Agan	0.014769004846968581939055	0.015708302263175900680175
OYSSWT02	Aganmu	0.008699312572367418000000	0.01005247958040394000000
41501	Agayawa	0.014834919803656760176285	0.015624887012431972171344
NASKEN01	Agaza	0.012967632250159282695510592453395	0.014066543204013771818648609409046
EBSZLL01	Agba	0.015221887711606760070627	0.015509858036706864671850
ODSASW01	Agba	0.015227231665280474022115	0.014997463865750489980412
ENSAGW08	Agba Umana	0.015128300429019135821277	0.015573418609160065653191
BNSWDP01	Agba/Kyan	0.014344201381756391119387	0.015418176122754567460688
EBSNCA02	Agbabor	0.015034974375138483727521	0.01530586574286154320790
ODSODI02	Agbabu	0.013635491759947000489981	0.015009135310629413315735
EKSGBN01	Agbado	0.013670695490576226000000	0.014711711863283815000000
OGSIFO01	Agbado	0.016067824548317806232361	0.013405306780729936194970
LASIOE02	Agbado Dalemo	0.015670221086107087268779	0.013762583521911358213361
EKSIKR02	Agbado/Oyo	0.014847555431531514850575	0.015356320916853925539272
EBSAKL02	Agbaja	0.015623738779872543000000	0.01566908835976598000000
IMSEHM01	Agbaja	0.015989226444395445816535	0.016086228394586559583239
OYSINW03	Agbaje/Idikan	0.016452302599574014000000	0.015222312661407635000000
KGSMPA01	Agbajogun	0.012546216020981375000000	0.013116084369146873000000
ABSKWU01	Agbala-Ozu	0.01586047129978725000000	0.015746236174531047665049
LASIKU03	Agbala/ Lasunwon	0.015891108383940789354000	0.015849783080323817305676
IMSRRT01	Agbala/Ulakwo	0.01550537251991519000000	0.016371164457186234000000
ENSNSK07	Agbamere/Umuabor	0.015324898061854742074739	0.015972548157938833543195
KD1301	Agban	0.01524817824443606862706	0.015607329704276604867964
ENSAGN12	Agbani	0.015365872167528642612443	0.015546360510767811863901
OGSADO03	Agbara	0.0155501137989617642522471189352352	0.0155775112504625568465933380700774
DTSUGH02	Agbarha-Otor	0.015705732070366178961034	0.015857382845278164733372
DTSUGH03	Agbarho 1	0.015410477817935698599426	0.015729854357614507421414
DTSUGH04	Agbarho 2	0.015546147031536731551528	0.015971987540430549131985
NASDMA01	Agbashi	0.012297625130541639642166	0.013345715140764949132756
DTSSAP02	Agbawan	0.015289617257843216335253	0.016196431506516701608445
OYSOSO02	Agbele	0.012354020444810856549831	0.013162700968253386079442
LASAMO06	Agbelekale	0.015757346207141234431715	0.013875635968851694235741
OYSOSO03	Agbeni	0.013201073511135043402597	0.013545453222114630337662
BYSSAG02	Agbere	0.015134220387327162522810	0.015502252651313223389062
KWSKEY01	Agbeyangi/Gbadamu	0.012217215632780939115242	0.013796158946341747671587
IMSKGE01	Agbobu 1	0.015412060903083823286041	0.015666605461148099947368
ENSAWG11	Agbogugu	0.015359078367075111542535	0.015678141607891655096288
ABSHAF01	Agboji	0.015767601343593032772321	0.015964706846402957642857
LASAON03	Agboju And Environ	0.01605449982471734266467	0.015355886747443770188623
CRSEFE02	Agbokim	0.014887989828636181458516	0.015586316129103085032302
KWSAFN03	Agbona/Fata	0.011540102811343881000000	0.01235018317196114000000
OSSIRE01	Agbora	0.011185004031471824000000	0.011584281974775405000000
BNSBGT01	Agboriko	0.014774329268192959153503	0.015409741924378347056807
OGSION02	Agboriodo	0.010919148360879378868548	0.012037602710893597064694
OGSION03	Agborogbomo	0.011303370291429176000000	0.012541658471257572000000
OGSSAU01	Agbowa	0.015571712151215665673704	0.016668024674089675929463
LASEPE01	Agbowa 1	0.01503190748008578000000	0.016179689157889802000000
LASEPE02	Agbowa 2/Ado	0.014334606497878876038813	0.015600875486779688952308
OYSIBN01	Agbowo	0.014308255083099463756111	0.013797052469607817327452
OYSOET01	Agboye	0.013729996659715377074607	0.014740827424722570639189
LASKSE01	Agboyi 1	0.014913541220128428000000	0.014839362062814769000000
LASKSE02	Agboyi 2	0.015384340353202043783784	0.015445413010137413252252
ANSUMZ01	Agbudu	0.014321709920341666000000	0.015158487561642158000000
EDSAGD02	Agenebode	0.014094915401688776348653	0.015292262384463232313881
DTSKPE03	Aghalokpe	0.014524852200621514435083	0.015708270649599149391046
DTSGWK02	Agiadiasi	0.01619973155034196292447	0.01613866939842988212768
LASKSE03	Agidi/Orishigun	0.015951189100025240411028	0.014270598842949775588471
LASKSE04	Agiliti/Maidan	0.015702929562306449808013	0.014098660591997209735392
OYSOLE01	Ago Igi Isubu	0.01197388524066935344466	0.01252728455243642875048
OGSIUN01	Ago Iwoye 1	0.015435789725827144581042	0.015210438728830367997344
OGSIUN02	Ago Iwoye 2	0.014146401963560776505727	0.015365459030760978057022
OYSIBN02	Ago Tapa	0.015589532016673859533945	0.014407342259081104225688
ODSODI03	Ago-Alaye	0.014233347036417241239231	0.015889832690896547045063
OYSATIB02	Ago-Are 1	0.008861984132955757528651	0.010237466191184476402957
OYSATIB01	Ago-Are 2	0.011148213133355207437229	0.012214354518087939912121
EKSADO01	Agoaduloju	0.014847512920271911235101	0.015459479559150263302003
OYSIBN03	Agodi	0.015431425662680925471062	0.014242791956681241839988
DTSPTN02	Agoloma	0.015595660298776739302153	0.016851484466547305016791
BYSSAG03	Agoro	0.01390088179521112379007	0.01533195352127564620090
OYSIRO01	Agoro	0.011263673148274151985179	0.012002223491135028645447
OYSOSO04	Agoro	0.012782948540896084000000	0.012605483571023049000000
OGSIKA02	Agosasa	0.014794074732084319019998	0.015575073498945557705329
OSSOLA01	Agowande	0.015613991132196930839185	0.015248827756713837622488
EBSBKL01	Agubatamgo	0.014691995189218291131809	0.015774406689268403041489
LASIKA01	Aguda	0.009874154246835843580892	0.009450003160961659710828
OYSINE01	Agugu	0.014955877441517108021791	0.013773812962861313113135
ANSAAH01	Aguleri 1	0.015427964500976005146546	0.015572615904256464626856
ANSAAH02	Aguleri 2	0.014784347357295452523259	0.015339278994358918340454
ANSAGU03	Aguleze	0.01515027374004313300000	0.01554143816023502400000
ANSNEN07	Agulu 1	0.016452302599574014000000	0.015541438160235024000000
ANSNEN08	Agulu 2	0.015620337038730082570546	0.014675930167486079757636
ANSNEN09	Agulu 3	0.015801288169808574000000	0.015030837362111204000000
ANSNEN10	Agulu Iv	0.01621557007965931000000	0.01541378796070407000000
ANSNEN11	Aguluzigbo	0.015209456870021811000000	0.015030837362111204000000
LASSUE02	Agunbiade	0.014736391041861734008432	0.012890059563906563539629
OYSATA03	Agunpopo 1	0.014084977400426961000000	0.014839362062814769000000
OYSATA04	Agunpopo 2	0.013102080337305488591463	0.013418669826876498459350
OYSATA05	Agunpopo 3	0.012901314800853436000000	0.013818160466567125000000
KD0801	Agunu	0.013312954297580266221351	0.014456006618567280873932
ENSAGW07	Aguobu Owa 1	0.015327823129979164000000	0.01566908835976598000000
ENSAGW03	Aguobu Owa 2	0.014913541220128428000000	0.01534996286093859000000
ENSAGW01	Aguobu Umumba/Umumba Ndiagu	0.015153864199113756539976	0.015497588855052634725994
LASIKU04	Agura/Gberigbe	0.015395976642316844840486	0.015534202806779200767307
NASGRU01	Agwada	0.013729878620554904000000	0.014711711863283815000000
CRSAKP02	Agwagune	0.013878961157670258141547	0.015011095915787934967235
NISAGR02	Agwata	0.014144160530405635000000	0.015286137761173112000000
NASNBB02	Agwatashi	0.013763963941723144802572939379329	0.014946969354544283167734913515238
KWSSHA01	Agwijin	0.013117179615780556043095	0.014521299273777795899119
RVSNDN09	Agwu-Obolo	0.015059451705678904455100	0.015784663019755556959937
NASAKW01	Agyaga	0.013642222326220099776790	0.015202447134579785790574
NASLFA02	Agyaragu Tofa	0.015009883872809233586729	0.015928482035210446115334
ODSIAE01	Aheri	0.0138184167794416010145840824777310	0.0148048220731547576122508354552544
RVSAHD01	Aheward 1	0.015564555649893869000000	0.01624351425765528000000
RVSAHD10	Aheward 10	0.015726943282821921396731	0.016033502411250101508971
RVSAHD11	Aheward 11	0.015280595863614121946471	0.015963370318467136485629
RVSAHD12	Aheward 12	0.015431979084292176123652	0.016111657760780245486510
RVSAHD13	Aheward 13	0.015647854295940810502060	0.016594080269768411791841
RVSAHD02	Aheward 2	0.015623738779872543000000	0.015732913459531456000000
RVSAHD03	Aheward 3	0.01568292190985122000000	0.016052038958358845000000
RVSAHD04	Aheward 4	0.015604293863887577104167	0.015908493478821312666667
RVSAHD05	Aheward 5	0.015652910425710795353238	0.016378893151989696516932
RVSAHD06	Aheward 6	0.015807247931838888999569	0.016550072232043338362789
RVSAHD07	Aheward 7	0.015817752240567457035213	0.016261770953253507210090
RVSAHD08	Aheward 8	0.015579796705292503346518	0.016184299053315682419604
RVSAHD09	Aheward 9	0.015539128265614735201508	0.016547784649774807747626
ABSNGK04	Ahiaba	0.016216406074213996396962	0.016067282610747276860903
ABSKPU04	Ahiabaubi/Umuchima	0.0156237387798725430000	0.0160520389583588450000
IMSABB01	Ahiato	0.015958222712064064133980	0.015726895424648048729866
ABSAPR01	Ahiaukwu A	0.015965563710361812245031	0.015888909257882835613299
ABSAPR02	Ahiaukwu B	0.015913812331216250997699	0.015894604269688028626248
KWSLEM01	Aho	0.0133747798406828460000000000000000	0.0138819855663326050000000000000000
OYSOIE02	Ahorodada	0.011734146286943582450463	0.012260917575131995768827
JI0501	Ahoto	0.011575988906216867377168	0.015240231451157104480149
LASBDY01	Ahovikoh	0.0153278231299791640000000000000000	0.0161796891578898020000000000000000
PLSJJN02	Ahwol	0.016138109178850030561235	0.015704105931478620463001
BNSBGT02	Ai-Oche	0.015081734039039257519238	0.015720731983347646857905
BNSBGT03	Ai-Ona	0.014439810785097319309417	0.015223457506246477636771
BNSBGT04	Ai-Oodo L	0.015096354048874258719655	0.015961586014669415882728
BNSBGT05	Ai-Oodo Ll	0.014893371044493486906365	0.015671783697717648198391
BNSBGT07	Ai-Oono Ll	0.015421521445413054217435	0.016227785856430191153639
BNSBGT08	Ai-Oono Lll	0.015184293407496811977845	0.015870791199760932157482
BNSBGT06	Ai-Oono l	0.014760067164398945355067	0.015665516210125597394694
LASOIO02	Aigbaka	0.015113085564524401390343	0.013773780211884908270996
LASIKU05	Aige/Solomade	0.014893539221119593140642	0.014679116692013209227273
LASOIO03	Ailegun	0.015610812720472290422273	0.013454868058063978116837
BNSJUX02	Ainu	0.014892129139392644350427	0.016001600181998299072494
LASSUE03	Airways	0.013762686659999603585598	0.012376198837626415547554
EKSGBN02	Aisegba 1	0.014535017220008700386496	0.015258051745211121832363
EKSGBN03	Aisegba 2	0.014684149243466892341085	0.015619611538242353643411
KGSMPA02	Aiyedayo/Aiyedero	0.01390742801049093000000	0.014584061663752857000000
KGSMPA03	Aiyede/Okagi	0.010652355861663736000000	0.012158707872664706000000
KWSLFF01	Aiyedun	0.015387006259957838000000	0.01592438875882789000000
KGSJMU01	Aiyegunle/Iluhafon	0.014172286377774379504449	0.01554823078791521325808
OGSOGU01	Aiyepe	0.014321709920341666000000	0.015605263260000501000000
KGSKPF01	Aiyeromi	0.014788917712948660889868	0.015538064146150505339207
KGSKAB01	Aiyeteju/Kajola	0.014209643800027203422581	0.015716167949485461621505
LASATO01	Aiyetoro	0.015309354707468747168307	0.013899802235743719146629
KGSJMU02	Aiyetoro/Agirigbon 2	0.014815660023289609629442	0.015721648520320551254533
KGSJMU03	Aiyetoro/Iluagbah 1	0.014542214118127103074783	0.015738147671109044800578
LASEPE03	Aiyetoro/Lagbade/Agbala/Olota	0.015249346821064705383260	0.016136670478312188299559
LASSMU01	Aiyetoro/Mafowoku	0.015527462829907233746507	0.014232450335703520103792
KGSKAB02	Aiyetorokiri	0.012271545395831263852696	0.012402279637252718920467
KGSKAB03	Aiyewa	0.013848244880512256000000	0.014903187162580246000000
OYSOLA01	Ajaawa	0.012074399694667222882805	0.013334720589861273205572
OSSILA01	Ajaba	0.009054411352239475000000	0.009605703882045596000000
LASEPE04	Ajaganabe	0.012098222201649117846612	0.012691312409575880428891
OYSOET02	Ajagba	0.015091157257625725008845	0.015601342407252190192368
ODSIRL01	Ajagba 1	0.012250300371087996000000	0.013754335366801648000000
ODSIRL02	Ajagba 2	0.013315596710704168000000	0.015222312661407635000000
OSSOUA01	Ajagba/Iwo-Oke	0.01082990525159976600000	0.01126515647594801900000
OYSIRO02	Ajagunna	0.00881767883232477000000	0.009605703882045596000000
LASIKU06	Ajaguro	0.015106589702411919507962	0.014949704337049704967857
LASEOA03	Ajah	0.016198335509824836991375	0.016181669356840359659320
KGSAJK01	Ajaka 1	0.014808217111742063711330	0.015397384017145050839386
KGSAJK02	Ajaka 2	0.014514370316407461719767	0.015254440504876135244219
ANSAJL01	Ajalli	0.01473599183019240100000	0.01515848756164215800000
KWSBDU02	Ajanaku/Malete	0.011954384721194613000000	0.013243734568677827000000
LASOJO01	Ajangbadi	0.016194080424517682125654	0.015213408204926650089313
LASOIO04	Ajao Estate	0.015601185863507770585028	0.014734712711308379828862
KGSAJA04	Ajaokuta	0.014061626652220495724616	0.014783579977491711452154
OGSSAU03	Ajara	0.014724491038554915476467	0.015035017201877359717318
LASBDY02	Ajara Topa	0.0113583093063024066271790808240887	0.0121066666463107605625990491283677
LASBDY03	Ajara Vetho	0.0124202408259301813280030702315466	0.0132896131967425848400921069463989
LASAMO07	Ajasa/Amikanle	0.015731451672131356289309	0.014462472050946758445975
KWSMUN01	Ajase 1	0.014246515457572515219735	0.015564663602260354698593
KWSMUN02	Ajase 2	0.0139803630832410680861273705293600	0.0146564255143089115259092585204261
CRSEFE08	Ajassor	0.014104635856962156564416	0.015486583753521117719849
ABSKWU02	Ajatanigu	0.01550537251991519000000	0.015796738559296936000000
JI2601	Ajaura	0.014953996496072832204956	0.016051148748617072122789
OGSIUU01	Ajebandele	0.013293881464010739843465	0.014409574543391946482932
OSSAME01	Ajebandele	0.01390742801049093000000	0.014903187162580246000000
OGSOBE01	Ajebo	0.014930316811311850379352	0.014842671212475345672883
LASEPE05	Ajebo Orugbo	0.014789510894509632800239	0.016086678165248273212411
LASATO02	Ajegunle	0.013916257462535326100426	0.013382639527726333938146
OGSIKA03	Ajegunle	0.013949959337773781799207	0.015033147769188171104736
OYSSWT03	Ajegunle	0.011082674800781166300217	0.012392092293845240410674
LASLID01	Ajele	0.014674191185352502375448	0.013507101642759893743636
CRSGEP03	Ajere	0.015727742447915652929156	0.015859701389601355545573
IMSNGB01	Aji	0.015961546312194259241091	0.015492100629443571012562
OYSONA01	Ajia	0.015341721607446862121879	0.016039829831089809611563
LASBDY04	Ajido	0.0143189228078252275970930232558140	0.0152885126486062468556201550387597
10708	Ajigin A	0.00976460891198359000000	0.012158707872664706000000
10709	Ajigin B	0.013315596710704168000000	0.015477613060469547000000
KWSLRN02	Ajikobi	0.015340334568277072129910	0.014829142513007514460787
OGSYES01	Ajilete	0.015871536272339373616120	0.016611186021170626594246
BA1405	Ajili	0.014904514103239348389478	0.017169889247685289026101
OYSIJA01	Ajimati/Ojaoba	0.01088908838157844000000	0.012158707872664706000000
KN0101	Ajingi	0.014004964453751878241747	0.015171972194197993114271
LASEOA04	Ajiran/Osapa	0.015493511285549403818711	0.015308158084054778004782
11601	Ajiri	0.009468693262090211000000	0.011520456875009927000000
11901	Ajiri	0.009839353045228944796277	0.012657465886109478448280
40201	Ajiwa	0.015447833814073056263618	0.015632026452086964307279
OYSEGA01	Ajiwogbo	0.01507498931734967207904	0.01551105084251579893107
ADSYLN01	Ajiya	0.015178485091870823825314	0.014907774363058783797692
GMSGME01	Ajiya	0.014623447747102815776967	0.014852339095327772734988
OYSOWT01	Ajokideru	0.011248354682924717460683	0.011479835702407256069019
ODSANW02	Ajowa/Igasi	0.013925458093662903378757	0.014936484071575452350260
DTSWRC01	Ajudaibo	0.012352927820655413010989	0.013597648253751012505495
ODSODI04	Ajue	0.014169241896802260036452	0.014948720993199899768265
KN0801	Ajumawa	0.014803693105706886867691	0.015291581595946518333468
OGSOBE02	Ajura	0.012853288532682726754797	0.013760687943023695247196
IMSKED02	Akabo	0.016051404681294383650779	0.015868437079524998921322
EBSSKA01	Akaezeukwu	0.01546178780164313701488	0.015721725911566968333991
AKSKPD07	Akai Mbokpo Udung	0.01619381587546532225280132105692	0.016633895931164718749079921427741
ENSNSK19	Akaibute	0.015397298978215000185185	0.015854499760694998880837
OGSRMN02	Akaka	0.015327823129979164000000	0.01643498955695171000000
CRSDUK05	Akamkpa	0.015364577838986772913871	0.016175985797613291729828
CRSKAM05	Akamkpa Urban	0.015220334058507392714834	0.015756388530093200365094
KWSFUF01	Akanbi 1	0.013937339138817088073434	0.014534159533914624738661
KWSFUF02	Akanbi 2	0.011007454641535793000000	0.012669308670788526000000
KWSFUF03	Akanbi 3	0.014144160530405635000000	0.014647886763518338000000
KWSFUF04	Akanbi 4	0.014476121224887095917553	0.015322463748805593526596
KWSFUF05	Akanbi 5	0.014560404027094817765481	0.014959150580070827867077
OYSONA02	Akanran	0.015427357257994399012247	0.015792210427218978483319
ABSHAF02	Akanukwu	0.013729878620554904000000	0.015158487561642158000000
OSSICL01	Akarabata	0.014993245555195748475152	0.015264280468623076093704
NISWSH01	Akari	0.010561664981044520821382	0.011836753099532198210778
OYSODS01	Akata	0.014380893050320344000000	0.014264936164925471000000
IMSMGD01	Akata 1	0.016165573234716950987450	0.015637470906117295062748
IMSMGD02	Akata 2	0.016121738359797376778789	0.015647273689370071510559
TRSDGA01	Akate	0.014352187248325130638999	0.015479043613292581046700
OGSABS01	Ake 1	0.0152588479941039103121748178980229	0.0150883530087260874609781477627471
OGSABS02	Ake 2	0.0142189423147972988122923588039867	0.0145513245001780595492801771871539
OGSABS03	Ake 3	0.0144713817612594966390617520344663	0.0146886749435982371771182383915749
OYSOWT02	Akeetan	0.009859639829421424156392	0.010682887775150009184940
ENSAGN14	Akegbe Ugwu 1	0.015035324519922887584296	0.015175438800609894598152
ENSAGN09	Akegbe Ugwu 2	0.014951524422950565753731	0.015274706400021086973881
LASAMO08	Akesan-Obadore	0.015900749973474646778909	0.015209541080337103299824
OSSIDO01	Akesin	0.01550537251991519000000	0.015541438160235024000000
ANSATN02	Akili/Obeagwe	0.015211895126313066911985	0.015788013405209145069288
LASOIO05	Akingbaye	0.014758182940984785052975	0.013738386398568660817852
LASSUE04	Akinhanmi Cole	0.016965186038562313560786	0.015198854569930068050371
RVSKNM11	Akinima	0.015643464908664431937406	0.016349595738445662246851
OYSAFO01	Akinmorin	0.014510759473441929916831	0.015101777814677986294255
OYSIDO01	Akinware	0.013315596710704168000000	0.013945810666098082000000
OYSISN02	Akinwumi	0.011185004031471824000000	0.011584281974775405000000
OYSAKE01	Akinyele	0.012254398620004681151784	0.013143257284085495701096
LASIKA02	Akiode	0.015802815887726094232014	0.014643270683569449038402
NASAWE01	Akiri	0.011776835331258586000000	0.012541658471257572000000
GMSAKK01	Akko	0.009359183321010434406306	0.010869136428122314469264
OGSIUN03	Ako Gelete	0.014811979821732737522197	0.015652985899216834340478
OSSOLA02	Akogun	0.0157421050398299000000	0.015030837362111204000000
LASSMU02	Akoka/Anu-Oluwapo	0.016153336220446375234963	0.014525392147085926228118
DTSBKW01	Akoku	0.0154987579962639998039991271807867	0.0162107158447562493005499049306306
LASBDY05	Akoro	0.0116605631668859892914911541701769	0.0136212006178384433117101937657961
ODSIRL03	Akotogbo 1	0.014189675916745440745195	0.015854275126395412000879
ODSIRL04	Akotogbo 2	0.013265188572128645561435	0.01452023656398738000000
LASAMO09	Akowonjo/Ilupeju	0.01586047129978725000000	0.015211130366300475144205
ENSNSK14	Akpa/Ozzi	0.014499259310277696000000	0.015541438160235024000000
ABSNGK05	Akpaa Mbato	0.016147417625660736748631	0.016236832628221523325624
KGSBJK03	Akpacha	0.014480807827821364995323	0.015915633328150785820733
BNSALD01	Akpachai	0.013704803134336422089938	0.015068341210948073789553
DTSWRC02	Akpakpa	0.011830206579738962547953	0.012574799005539874143923
ENSUDD04	Akpakwume/Nze	0.012782948540896084000000	0.013818160466567125000000
NASDMA02	Akpanaja	0.013752985723346204863875	0.015183269024668531564820
KGSAJK03	Akpanya	0.014509620844079352254353	0.014824401284460612677843
KGSNDG01	Akpanya	0.012297719790631484906366	0.014377567152068081681725
CRSKMM11	Akparabong	0.012861780283238866250181	0.014249891329491766344879
KGSKKF01	Akpasu	0.012317818706199298115662	0.012679138371143841713791
AKSAUQ07	Akpautong	0.01586047129978725000000	0.01624351425765528000000
ENSMGL11	Akpawfu/Isienu	0.015346488043519470703988	0.015529475797741909696685
CRSAKP10	Akpet-Abini	0.014708165811187413218580	0.015637455303273589492993
ANSAGU04	Akpo	0.01603802068972328000000	0.016307339357420757000000
RVSKHE18	Akpoku/Umuoye	0.015773708092708233867181	0.01631787249002246809925
ANSUMZ02	Akpu	0.014735991830192401000000	0.015094662461876681000000
ENSUMU13	Akpugo	0.014617625570235049000000	0.01534996286093859000000
ENSAGN13	Akpugo 2	0.015602783987439902444976	0.015520192211099147663021
ENSAGN11	Akpugo 3	0.014904293856069260981250	0.015420569377554150037500
ENSAGN10	Akpugo 5	0.015091090610064459000000	0.015541438160235024000000
ENSJRV10	Akpugoeze	0.015387006259957838000000	0.016307339357420757000000
IMSURU01	Akpulu	0.015802064230699798095083	0.015312809479813916546097
RVSABM01	Aktward 1	0.013917167006563373544304	0.015094662461876681000000
RVSABM10	Aktward 10	0.015766879887018087232350	0.016873230988348084132687
RVSABM11	Aktward 11	0.013084964821486318404028	0.013930232501937314325829
RVSABM12	Aktward 12	0.012822933760698835802581	0.014047170270414503597763
RVSABM13	Aktward 13	0.015160892131930824663421	0.015401360263948621369958
RVSABM16	Aktward 16	0.014464230031842283823675	0.015391749473420687150865
RVSABM17	Aktward 17	0.015925618160938282374827	0.015925393702438139955209
RVSABM02	Aktward 2	0.01586047129978725000000	0.015541438160235024000000
RVSABM04	Aktward 4	0.015999779282660134030769	0.017042800891641414861538
RVSABM05	Aktward 5	0.015801288169808574000000	0.015094662461876681000000
RVSABM06	Aktward 6	0.015327823129979164000000	0.01452023656398738000000
RVSABM07	Aktward 7	0.015978837559744604000000	0.015732913459531456000000
RVSABM08	Aktward 8	0.01603802068972328000000	0.016371164457186234000000
RVSABM09	Aktward 9	0.01603802068972328000000	0.015605263260000501000000
IMSKGE03	Aku	0.016082753208725244775577	0.015833459065449150094869
ENSGBO04	Aku 1	0.015564555649893869000000	0.01643498955695171000000
ENSGBO08	Aku 2	0.01550537251991519000000	0.01643498955695171000000
ENSGBO13	Aku 3	0.015623738779872543000000	0.015860563659062413000000
ENSGBO07	Aku 4	0.014719276929466205257322	0.016017188851583134755230
ENSGBO14	Aku 5	0.014861855683435460061995	0.015552448420032842916442
ABSMBA01	Aku-Na-Ekpu	0.015984225462513181652829	0.016161131715043381967670
KGSBAS01	Akuba 1	0.014318526408596928323673	0.014791149177343885039648
KGSBAS02	Akuba 2	0.013226419467674070390738	0.014335577896185437824313
DTSASB01	Akuebolu	0.016197627498165304936396	0.015446818665250484155272
OYSIDO02	Akufo	0.008758495702346093000000	0.010243954879700375000000
DTSBMA01	Akugbene 1	0.015343186811268878870927	0.016227594234935811911776
DTSBMA02	Akugbene 2	0.014872500532288437532588	0.015645466964700240688125
NASNSW01	Akum	0.012901314800853436000000	0.013562860067505216000000
IMSMGD03	Akuma	0.016171872055123054459080	0.015955855423411856106404
ABSNGK06	Akumaimo	0.015982983471411596172666	0.016108554959031336324553
DTSAYB01	Akumazi	0.015882157389572019887616	0.016114760826767087207305
ODSASW02	Akungba 1	0.014482540076058718686250	0.014706206948429041735000
ODSASW03	Akungba 2	0.014651079986222992882635	0.015115682704314411188024
NASLFA03	Akurba	0.015270436159752758385232	0.015703699443651889847295
OGSIFO02	Akute/Ajuwon	0.014966565380580268299909	0.014284323225778146503309
KGSKAB04	Akutupakiri	0.011158744404123425342252	0.012242029156750964157191
BA1408	Akuyam	0.014261712661796047833646	0.015363153645982240336601
CRSBKS07	Akwa	0.011954384721194613000000	0.012669308670788526000000
RVSKHE05	Akwa/Odogwa	0.016471577839154224316514	0.017053185420047153337156
ANSNEN12	Akwaeze	0.015544811661982537994036	0.014878438065899702799655
TRSWKR01	Akwana	0.014399248685362440956154	0.015261607839476214221355
NASAKW02	Akwanga East	0.015123820147947141252942	0.016023002614419490826446
NASAKW03	Akwanga West	0.015579191537883928718624	0.016089965441601234807855
ANSUKP01	Akwauhtedi	0.015962021947530996620536	0.01555834122536427747132
TRSKRM02	Akwento Boko	0.010633402140292827315693	0.011690501848837660725365
ABSKEK01	Akwete Ohandu	0.016007386112879952365899	0.016273418809413000808169
ENSUWN10	Akwuke Central	0.015551831895579890975439	0.015491392686661703882782
12101	Ala	0.012413462929809419468784	0.013639916688329337907065
12102	Ala Lawanti	0.011560202742280033448113	0.012584409245628787537736
ODSIDNE02	Ala-Elefosu	0.011891265601746636901241	0.013060324088185399375736
LASATO03	Alaba	0.014828901992317309701863	0.014302497830781240504658
LASAMO10	Alabata	0.01255149408115656198145	0.012118322666146171182683
OGSODA01	Alabata	0.011635288342869964031660	0.012801592035634887166214
OYSAKE02	Alabata	0.010543585380831219240498	0.011664138133506936733296
LASIKA03	Alade	0.014345742538587277180266	0.012134728043910313667932
ODSIDNE01	Alade-Atosin	0.014466470547623668929589	0.015441170492043397068232
IMSWER01	Aladinma 1	0.01547558605659992753272	0.014903187162580246000000
IMSWER02	Aladinma 2	0.01612876090899575346578	0.015869593205928794584875
DTSALA01	Aladja	0.015126117994206265081693	0.015765164408013564126288
OYSINE02	Alafara	0.010652355861663736000000	0.009861004281107508000000
LASAPA03	Alafia	0.011805749226820687374046	0.010725810022204629511450
LASMUN01	Alafia/Adeoyo	0.014969338505610419442863	0.013218350653137893249437
11701	Alagarno	0.011976431475005935377203	0.014818046143863570154548
70506	Alagarno	0.010184903668940955672645	0.014338734924119943239828
BA0705	Alagarno	0.010964078724810209116644	0.014027065500756084776216
LASLID02	Alagba/Obadina	0.015327823129979164000000	0.013754335366801648000000
LASAMO11	Alagbado/Alakuko	0.016714813294060877093481	0.014640048502896133703367
LASIOE03	Alagbado/Kollinton	0.015620158656217531944833	0.012438217439502301254152
OGSODA02	Alagbagba	0.013552329230618873000000	0.014967012262345723000000
LASOIO06	Alagbeji	0.014674250409097357757979	0.013732375694045374802818
LASLMD05	Alagomeji	0.014927216282267076909955	0.013380218621661206811174
LASAMO12	Alaguntan	0.014128931120893591102854	0.013383575269942427433528
NASDMA03	Alagye	0.013142217652423663173144	0.014104743431599345278443
KN3501	Alajawa	0.013088075427780473540013	0.014935883952819273420920
EKSEFO01	Alajo/Surulere	0.015149586235630045818729	0.015154149895497278310499
OSSESH01	Alajue 1	0.015176963891445002962157	0.015757288393539107438797
OSSESH02	Alajue 2	0.013822086659454506920039	0.014589223626778169893342
DTSEFR01	Alaka	0.01536456186792636180601	0.01552221526559625684726
LASMUN02	Alakara	0.012965887083537243937301	0.012244472602941647256608
OYSEGA02	Alakia	0.015679334150946839930547	0.014814417900973177998219
LASATO04	Alakoto/Ibafon	0.015569564880330935705329	0.014275740413788593125392
LASIOE04	Alakuko Ajegunle	0.016426729444034201311917	0.013354314995058239482438
OYSSET01	Alamodu	0.008580946312410066000000	0.009924829380872986000000
EKSEFO02	Alanaka	0.015421464927502769837424	0.014906182769830653334538
KWSLRN03	Alanamu	0.015426455907151243944873	0.014941478487094178084362
BA2009	Alangawari	0.011519289210058158021708	0.014037824128982769608940
CRSBJE06	Alankwu	0.014628687657542912331526	0.015610211558152718157209
OYSOET03	Alaodi	0.012082556434489117764702	0.013327435099130244929657
OGSOBE03	Alapako	0.014558818000275066480845	0.015414125474615968818809
OYSODS02	Alapata	0.015097481035678573936961	0.015304972562694892949053
OSSISO03	Alapomu 2	0.014518350642528881827957	0.015124172991875771397849
OSSISO02	Alapomu I	0.014332332533414761346154	0.014640522328930012653846
OGSADO04	Alapoti	0.016009256444265067056028	0.016345425997137664085439
12608	Alarge	0.012808935467657258014164	0.013927368285995874104816
OYSOGN03	Alasa	0.015363164583850263792862	0.015989315574801123544670
11302	Alau	0.012443085149738756309074	0.013377956912703565710792
ABSMBA02	Alaukwu	0.015687146133254904338290	0.015706861429961757314498
ABSNGK07	Alaukwu Ohanze	0.015974087683261415761186	0.016133533758562751756152
LASIKA04	Alausa	0.014689732049733246072574	0.013558351432541535048730
ABSBND01	Alayi 1	0.01556238082025430802580	0.01572994426998020934871
ABSBND02	Alayi 2	0.01449211812652761171777	0.01563603070108579083128
JI2501	Albasu	0.01177997086132368034570	0.01480402578241480954834
KN0201	Albasu Central	0.014785637744178320957080	0.015592435456694179404064
CRSUDU01	Alege/Ubang	0.014892028319380636187093	0.015915254811381189477283
OSSOSO02	Alekuwodo	0.014838041798399183688262	0.014510843027729841225757
51101	Alelu	0.012412889087612535381191	0.013639300843169401102930
OYSISW02	Alesinloye	0.015656563552095791135522	0.014945840249422379106128
JI0901	Alhaji Barka	0.014029566900247720029880	0.014932048313271011440239
PLSJJN03	Ali Kazaure	0.01615638694968063000000	0.015541438160235024000000
50101	Aliero Dangaladima 1	0.015474740045604620100503	0.015514817641237361527638
50102	Aliero Dangaladima 2	0.014913541220128428000000	0.014967012262345723000000
50103	Aliero S Fada 1	0.015289568307334393915439	0.016280885264180356085842
50104	Aliero S Fada 2	0.014490425745094156762407	0.015260760653256407403157
IMSTTK02	Alike	0.016106902552896698882819	0.015904538309297305607930
TRSARD01	Alin Gora	0.013374779840682846000000	0.014201111065159991000000
51801	Aljannare	0.014221178715812545930534	0.015476424631046232147282
ADSYLN02	Alkalawa	0.015076187412951351529770	0.015142415447123858228961
BA0101	Alkaleri East	0.012429617986916067314423	0.013968763998437846838838
BA0112	Alkaleri West	0.013429543011270336640462	0.014015134221601860586262
62202	Alkanmu	0.0139755078099975379899310777033325	0.0150848121584766254102139401677688
KWSWSN01	Alla	0.011125820901493146000000	0.013881985566332605000000
BNSTKP03	Allan	0.013144428160223912826013	0.014484373630006207880776
NISKUT01	Allawa	0.011873991987514659633177	0.012334361738779837533646
KGSKFU01	Alloma/Okula	0.013964687933881435622076	0.015003925209865213446519
LASLMD06	Aloba/Desalu	0.010760022346709688141243	0.010690369984274733152542
NASNEG01	Alogani	0.014300320365213502625000	0.015661643876975608033654
KGSKFU02	Aloji	0.013425347504385201396044	0.014548040821524472851229
ANSJJT02	Alor	0.016131656138651610050913	0.015445878125005017316555
ENSBBG06	Alor-Agu	0.015327823129979164000000	0.015605263260000501000000
ENSNSK13	Alor-Uno	0.015947822603021598979747	0.015804332938256371622785
NASKEN02	Aloshi	0.011788005086432960811659454272530	0.012906071605235109395256196179007
FCTABJ01	Alu Mamagi	0.013019681060810789000000	0.014201111065159991000000
IMSNGN02	Alulu/Obokwe/Oburu	0.015789942181159813119171	0.016341118000153781467061
OSSENH01	Alusekere	0.015185576387460216166591	0.015639068450684117380781
50301	Alwasa	0.014777489791141057205023	0.016232800408258460015889
ABSKPU05	Amaasa Nsulu	0.015491225519299973283864	0.015744157789388799125535
EBSBZR02	Amachi	0.014852068352377924566689	0.015158487561642158000000
EBSAKL03	Amachi Ndiebor	0.014854358090149754000000	0.015222312661407635000000
EBSAKL04	Amachi Ndiechi	0.014854358090149754000000	0.014967012262345723000000
EBSAKL05	Amachi Ndiegu	0.015027652927441634805272	0.015665769901526410462527
AKSKRT01	Amadaka	0.015243799815064753955068	0.015804451298810028820360
ANSAJL02	Amaetiti	0.01503190748008578000000	0.015796738559296936000000
EBSSKA03	Amaeze	0.014617625570235049000000	0.015094662461876681000000
EBSZLL03	Amaezu	0.014025794270448283000000	0.015158487561642158000000
EBSNKE01	Amagu	0.014957575084754201085324	0.015200965017117475873720
IMSMGD04	Amagu	0.01586047129978725000000	0.015605263260000501000000
EBSAKL07	Amagu Unuhu	0.014743013557478005474576	0.015328597679237434411017
EBSSKA04	Amagu/Ihie	0.01551723507499306522673	0.01549704720913855236692
ENSMGL12	Amagunze	0.015019002143623678308222	0.015097469386344642428526
EDSGUE02	Amahor	0.013975243307381503578174	0.015374508400355219714586
DTSBKW02	Amai	0.0139666111404696080000000000000000	0.015413787960704070000000000000000
IMSRLU01	Amaifeke Ezioha	0.015978837559744604000000	0.015732913459531456000000
IMSRLU02	Amaifeke Ofeahia	0.015816879394417796923979	0.015511241273999588787983
IMSAMG06	Amaigbo 1	0.015917102902452601202346	0.015573415820064356187327
IMSAMG07	Amaigbo 2	0.015938076037806530801946	0.015871835068254627468024
IMSAMG08	Amaigbo 3	0.015978837559744604000000	0.015860563659062413000000
IMSAMG10	Amaigbo 5	0.015909118648146978826818	0.015688402706158724556531
IMSAMG11	Amaigbo 6	0.016105405079552433157229	0.015682652788030593769487
EBSEDA01	Amaigbo Etiti	0.015485884045211393403918	0.015701893984738720838619
IMSAMG09	Amaigbo Iv	0.01603802068972328000000	0.015553624336801224637232
IMSNWA02	Amaike	0.015914131130285960986030	0.015537846914807784935002
IMSKED03	Amaimo	0.015917407915389115828937	0.015949784348535064021276
IMSIHI02	Amainyi	0.015956524603596385108524	0.016000958052647231249046
ABSMBA03	Amaise	0.015996171376170813258631	0.016330697273262829798792
ABSMBA04	Amaise Ahaba	0.015582007577398920166559	0.015728859759092689765392
ABSSSM01	Amaise Amapuife	0.015834653155836820767541	0.014920866598390818535692
ABSMBA05	Amaitolu	0.01612761836654710237001	0.016117639121358430401451
ABSSSM02	Amaitolu	0.016364047905434272370131	0.015329944595391976294463
ABSMBL03	Amaiyiobiliohia/Nunya	0.014499259310277696000000	0.015860563659062413000000
ABSKEK02	Amakam Akwete	0.015578485089211469249139	0.017009415454841012000000
ABSAPR03	Amakama	0.015932887296383723135811	0.016001629000083167614860
IMSIHI04	Amakohia 1	0.015875968815724108045625	0.015712515615188885636975
IMSUMG01	Amakohia Ubi/Ndegwu	0.01614104546676787415980	0.015962549777705829715153
IMSKED04	Amakohia Ward	0.015947460681633736587481	0.016145177395799417281297
IMSRRT02	Amakohia/Akwakuma	0.015916651303176807220661	0.015389179461649841972273
IMSNGN03	Amala/Ntu	0.015788275233154877483644	0.016234158528745556520083
ENSBLF01	Amalla	0.015045493921073165589223	0.015894048758933262079017
EBSNKE03	Amana	0.014962874585880717212729	0.015179732202966199950684
IMSAWD01	Amanachi	0.01585921918843368014104	0.015835447717123670110014
EBSNCA03	Amanator	0.01542312822858284385288	0.01547110503864349611289
IMSRLU03	Amanator /Obinigwu	0.016570668859531366000000	0.016179689157889802000000
IMSUMD01	Amandugba 1	0.015922981590395051472743	0.015764771643911840329642
IMSUMD02	Amandugba 2	0.015891901661532859752633	0.015688994233241855670661
JI2502	Amanga	0.01393348822726520556031	0.01561560887285336152170
EBSEDA02	Amangwu	0.015119990424367743618719	0.016023035208827177688092
ABSKPU06	Amano Nsulu	0.015825587296075505218773	0.016075258481670344584873
ANSACA04	Amansea	0.015261601249746875059830	0.015591345638558058488395
ANSACA05	Amanuke	0.014321709920341666000000	0.015094662461876681000000
IMSTTK03	Amanze	0.015935281996180016637057	0.015892512563662060856302
IMSNGB02	Amaofuo	0.015894951631668753861381	0.015726325953425288742921
ANSAJL03	Amaokpala	0.01449925931027769600000	0.0154137879607040700000
IMSNKR01	Amaokpara	0.015951568621212978979630	0.015408940822418347736169
EBSEDA03	Amaoso Etiti	0.015455500680946272651967	0.015402224891378261650775
ABSGWB02	Amapu Ideobia	0.015387006259957838000000	0.015988213858593368000000
ABSKPU07	Amapu Ntigha	0.015935882877790859085395	0.015764774815578943159886
IMSUML01	Amaraku	0.015957516403555001458661	0.015749291737455550714320
KN4301	Amarawa	0.013019681060810789000000	0.014584061663752857000000
BA2013	Amarmari	0.012331991883358135035348	0.014411717844155300230999
IMSAWD02	Amaruru	0.016024811633408293269490	0.015810453252281761489118
JI2401	Amaryawa	0.012388183246034361594190	0.013686933234597171109495
ABSKPU08	Amasa Ntigha	0.0158628424187767816442	0.0158361178275817243506
ABSSSM03	Amasaa	0.015878841820886282108108	0.016027836647800764859951
ABSSSM04	Amasator	0.016561035342422448556591	0.016122024516385727351371
EBSAFK22	Amasiri	0.015415310423473924517913	0.015921292879622619204728
EBSAFK23	Amasiri/Ezeke	0.015728588615966674451888	0.015790657041257101122937
BYSSPR01	Amassoma 1	0.013997059464159130427846	0.013823409592843642690140
BYSSPR02	Amassoma 2	0.013750743349564158187042	0.014699561613972169247616
BYSSPR03	Amassoma 3	0.011540102811343881000000	0.013243734568677827000000
EBSAFK24	Amata/Akpoha	0.014983724336693308265005	0.015064117620742945092938
ABSSSM05	Amator	0.015919654429765926000000	0.014839362062814769000000
IMSKED05	Amatta	0.016135567181661680360836	0.016198608766128135710472
ABSUNC01	Amauba/Umuogbuele	0.01503190748008578000000	0.016179689157889802000000
IMSUMD03	Amauju	0.01603802068972328000000	0.015605263260000501000000
IMSUML02	Amauzari	0.015908703847471862592446	0.015543446264704387759430
ABSSSM06	Amavo Etiti	0.01586047129978725000000	0.015860563659062413000000
ABSSSM07	Amavo-Nkworgu	0.015801288169808574000000	0.015860563659062413000000
ANSAWK01	Amawbia 1	0.015446189389936516000000	0.014775536963049292000000
ANSAWK02	Amawbia 2	0.01586047129978725000000	0.015286137761173112000000
ANSAWK03	Amawbia 3	0.014262526790362991000000	0.014967012262345723000000
ANSHAL01	Amawu Ward A Ihiala	0.015900861132614304508549	0.015758961138516829576222
ANSHAL02	Amawu Ward B Ihiala	0.01603802068972328000000	0.015929249460375866412100
EBSEBJ02	Amawula	0.015747752986117992531803	0.016148438475729658546036
NASGRU02	Amba	0.011629955295278124750317	0.012287620024259257828480
PLSBKK01	Ambul/Bargesh	0.012909923256123060886869	0.014009893645054531769697
50601	Ambursa	0.015115772536273203357949	0.016071123766269323655780
10302	Amchaka	0.014025794270448283000000	0.013945810666098082000000
ENSBBG08	Amebo/Hausa/Yoruba	0.013966611140469608000000	0.014584061663752857000000
ENSUWN12	Amechi East	0.015824509215211411273572	0.015161905096206900776910
ENSMGL01	Amechi Idodo/Orukwu	0.015303145308984821882794	0.015579640080542775581866
ENSUWN07	Amechi West	0.015838192375057761749040	0.015409865291320274578745
BNSPKG01	Amejo	0.014751859431492608805642	0.015647345426701558468005
EBSNKE04	Ameka	0.014822312821938234281559	0.014931208334282501624710
EBSEDA04	Ameke	0.014596935154194941676412	0.015465456321865158746954
ABSHAF03	Ameke 1	0.015925429640204260217617	0.016110958674809014967185
ABSHAF04	Ameke 2	0.015812290161919994034188	0.015884020747010409507835
EBSBZR04	Amenu	0.015193464914950232601313	0.015536365091917317923883
ANSNSH01	American Quarters	0.016076670897056293551020	0.015396854770970369408163
ANSAGU05	Amesi	0.015500674536702944296225	0.014722956943784605720232
EBSNKE05	Amezekwe	0.015428647998319125152062	0.015697710956052560105670
ANSUKP02	Amichi 1	0.015849354738088453528694	0.015398936748796705365922
ANSUKP03	Amichi 2	0.016193287726069386717399	0.015437036790347459221584
ANSUKP04	Amichi 3	0.015692069952968120016481	0.015523312997928649613192
IMSRLU04	Amike/Eziachi	0.015952370124579868685749	0.015523674243610433047380
NASKEN03	Amiri	0.013211146826796584523001	0.013725226408388591984884
IMSMGD05	Amiri 1	0.016121863628216204627382	0.015833969683056301398661
IMSMGD06	Amiri 2	0.016099121652286047455764	0.015802986396950875143711
OSSAYE01	Amobi	0.013793715558875954009059	0.014752201602666812823096
ENSAGN01	Amodu	0.015091090610064459000000	0.01541378796070407000000
EBSAFK25	Amogu Akpoha/Ibii	0.014961603181597023957341	0.015078183002649101473739
ABSHAF07	Amogudu 1	0.015494942647789298718607	0.015841868191664121395198
ENSUDD21	Amokwe	0.015014826170213887554007	0.015297349777827617409988
EBSSKA05	Amonye	0.015457505070995639286354	0.015880958168893930915635
ABSUNC02	Amorie	0.015347055524441386858680	0.015684609671688861750359
ENSNKW02	Amorji	0.015461391041776423705736	0.014760097973829214371571
ANSHAL03	Amorka	0.016066817514422170909953	0.015741953440888745036194
CRSBKS05	Amoto	0.01426104515428563737622	0.01602975787346157877608
PLSMGU01	Ampang	0.014625735394851757070907	0.015465368556185335786034
PLSKWK01	Ampang-A	0.01187332138744204027225	0.01336279812872761992479
PLSKWK02	Ampang-B	0.01319723045074681600000	0.01420111106515999100000
PLSKWK03	Amper B	0.011692650379844243581630	0.014445899898344556490771
PLSKWK04	Amper C	0.01410744440267221692611	0.01510738602013281197726
IMSNSA04	Amucha	0.015991860848290102367822	0.015800728636333238191262
ABSUNC03	Amuda	0.015131238558769158166034	0.015560331358647575066414
LASATO05	Amukoko	0.015579826750581726992267	0.014296530754331755320675
DTSSAP03	Amukpe	0.0152126229098408656877009692963236	0.0159539051389731546973873866299754
OYSISW03	Amule/ Atere	0.014084977400426961000000	0.013562860067505216000000
IMSETU01	Amumara	0.015866788600178234269663	0.015885364610750308445693
DTSSAP04	Amuogodo	0.0157787848102034612017856681760682	0.0161427044638695093948301216912713
IMSUMD04	Amurie Omanze	0.015902025003996120032286	0.015669582671806374165818
IMSKGE04	Amuro	0.015811032662200931628319	0.015773128238944739768848
ENSAGN04	Amurri	0.015176911939446452697652	0.015630555985445724990215
IMSAFR01	Amuzi	0.015978837559744604000000	0.015477613060469547000000
IMSTTK04	Amuzi	0.016002854560859337326730	0.015932398890955261099204
EBSBKL02	Amuzu	0.015153834183721823620414	0.015628169607447220455869
EBSNKE07	Amuzu	0.014854358090149754000000	0.015030837362111204000000
IMSABB03	Amuzu	0.015635200301523344088028	0.015735160822199256725352
KN0401	Anadariya	0.01330077016774693257069	0.01472770131135395828586
ANSNKK01	Anaku	0.014276400710635900138422	0.014778770668058525005664
KGSNDG02	Analo	0.013156023713200056229414	0.013985054100912502218719
AKSRNN05	Anamfa	0.015988633119293538420316	0.016081958248755518171195
IMSUML03	Anara	0.016076744658373000259482	0.015910078266819036119529
ANSZBL02	Anaubeahu	0.015902138741448479388114	0.015484519873364784772788
KD1501	Anchau	0.011918132129269148037878	0.013161032998263688167071
NASAKW05	Andaha	0.015473504680695904596030	0.016165752163400068906203
10303	Andara	0.011954384721194613000000	0.012414008271726618000000
51401	Andarai	0.014110168733580180280440	0.015718430977230524962885
JI1901	Andaza	0.012662222820607353057955	0.015226482850650341116279
BA1601	Andubun	0.013136644041632628453273	0.016417769783344696842716
EDSFUG04	Anegbete	0.013379411563898566657971	0.013430214860166527127536
BYSSAG04	Angalabiri	0.01427140425985979091154	0.01515929414257326077967
CRSUDU08	Angiaba/Begiaka	0.014975868208273302643648	0.015966430258806212459938
41401	Anguwan Musa	0.014134020911721118429391	0.014300303048164690799283
41402	Anguwar Ibrahim	0.013741050946112101444444	0.014410532651011798217687
PLSJJN04	Angwan Rogo/Rimi	0.015707578859643426789101	0.015304398348299476485559
ABSHAF09	Ania	0.015418253014803335252387	0.016098666981448086634379
LASIKA05	Anifowoshe	0.014120433497303078958338	0.012863375170683020527070
LASLID03	Anikantamo	0.01775433145910489000000	0.01656263975648267000000
PLSQAP01	Aningo	0.013659857031014441305103	0.014725363920454062541440
LASAPA04	Anjorin	0.016669648390624999981544	0.015933344146919993556749
OYSIBE02	Anko	0.013920289956262676309476	0.014111867675778190832591
KGSKPA01	Ankpa 1	0.013526204766541369557556	0.014933394778092840965952
KGSKPA02	Ankpa 2	0.014186417150991395394482	0.015021847005359557293814
KGSKPA03	Ankpa Suburb 1	0.014022863593878399697454	0.014848387934576077971593
KGSKPA04	Ankpa Suburb 2	0.012806783644639203582418	0.013920319853887259495109
KGSKPA05	Ankpa Township	0.014143125222695047118477	0.014958720899122041645562
BNSMKD02	Ankpa/Wadata	0.015858443688422089491811	0.015833000422890213795041
KD0802	Ankwa	0.012509329028612395144660	0.014254662072226994842721
LASKSE05	Anthony	0.016485399418575814841383	0.014199780699582775671073
EDSAUC09	Anwain	0.01230948350106667000000	0.013964579090749909713768
EBSNCA05	Anyagarigwe	0.01529722019000646635891	0.015300096970589653395710
BNSGMU02	Apa	0.015009645099062215110737	0.015663344337243396566639
LASBDY06	Apa	0.0137323531765122003017421602787456	0.0147263449349373637351916376306620
OYSOET04	Apaara	0.015268640000000486000000	0.015860563659062413000000
KWSKEY02	Apado	0.011125820901493146000000	0.012796958870319484000000
LASAPA05	Apapa	0.014802421874046016712878	0.013381670445792380943702
LASATO06	Apasa Amukoko	0.014762166962278884037300	0.014259948057661382710480
OYSOSO05	Apata Alaje	0.008422601461074048665614	0.010701856939766724998026
OYSISW04	Apata/Odo Ona	0.016089370320364063434826	0.015066716897309007752391
LASSMU03	Apelehin	0.014756280657685090607036	0.013351893270675611988772
LASOIO07	Apena	0.014458517075223124214297	0.013165026475058950779761
OYSINE03	Aperin	0.01583030781478738039835	0.01478060824871426543987
LASEOA05	Apese/6 Extension	0.015292088911607561888688	0.015142896111278268720517
OYSIDO03	Apete	0.015167485075493757540011	0.014914592566767042602241
CRSBRA06	Apiapum	0.014795174960171076000000	0.015477613060469547000000
OYSOET05	Apinni	0.012013567851173291000000	0.013052259269381392000000
BYSSPR04	Apoi	0.013369091945973251435351	0.014508615962418377486506
ODSESO01	Apoi 1	0.012724180546204748622215	0.013860796804834987988566
ODSESO02	Apoi 2	0.014090854632941146780156	0.015079182209466848471209
ODSESO03	Apoi 3	0.013663332613012955585531	0.015430661262940919743070
ODSESO04	Apoi 4	0.014530919300847715022886	0.015333406468685021658295
ODSESO05	Apoi 5	0.014528123477200871078731	0.015528975857259571199370
ODSAKS01	Apomu	0.015187905237851041479986	0.015093057225573687530995
OSSOIE01	Apoti	0.013346706971874921037325	0.014341069682064072648523
NASNSW02	Ara 1	0.011975095852555410823221	0.013935675642845275375574
NASNSW03	Ara 2	0.012757459518291687293594	0.014544973009648664237546
OSSEDE02	Ara 2	0.013032667738894738471703	0.013595425770749226190452
OSSEDE01	Ara I	0.015344235001827795392794	0.015750612580183824670816
60801	Araba	0.013966249338838464475869	0.015087454414895443708172
LASBDY07	Aradagun-Mowo	0.0155319368748461427264076130055511	0.0162555774208411938604282315622522
OSSIEW02	Aragan	0.011597643866039910672832	0.011918791905164762365896
KD2002	Arak	0.013808534295692523843778	0.015398184303765416888578
LASSUE05	Aralile	0.015147757155337295416422	0.013401144858715266357771
EKSEWT01	Aramoko 1	0.014916097751431881950847	0.014702054935965953750392
EKSEWT02	Aramoko 2	0.015072992474557997202494	0.015459084624289830702322
KWSMUN03	Aran	0.015424924474698828330555	0.016155920706113864923399
KWSMUN04	Arandun	0.014880768247546093501357	0.015388088906027185376631
LASLMD07	Araromi	0.015268640000000486000000	0.014137285965394514000000
OSSBOE02	Araromi	0.014692631460160639894150	0.015347735369041198762375
OYSOET06	Araromi	0.014142310036727333624027	0.014890357434428426796389
OYSONA03	Araromi	0.013552329230618873000000	0.01369051026703617000000
LASLID04	Araromi Odo	0.010770722121621088000000	0.011009856076886107000000
EKSEKE01	Araromi Omuo	0.015052423099485813523768	0.015215939849188811771435
LASBDY08	Araromi-Ale	0.0155375007138269512866983068087336	0.0162471250116645292905007908797433
EKSIKR03	Araromi-Ekiti	0.014867062227219692727998	0.014819868104100751014106
ODSODI05	Araromi-Obu	0.0143353048921856993916778955752093	0.015793063828013211132910819000013
EKSEFO03	Araromi/Idoayegbule	0.014676808700213723000000	0.015860563659062413000000
LASKSE06	Araromi/Ifako	0.016451571943648350447384	0.014593198296200179794533
OSSADE01	Araromi/Owu	0.0081666644025593300000	0.00909510308392177600000
JI1601	Arbus	0.012862806624089729590679	0.014337835656322452836332
CRSBKS09	Archibong	0.013256413580725494000000	0.01400963576586356000000
10901	Ardimini	0.010179417180509316758611	0.011841350966457360197408
TRSARD02	Ardo Kola	0.012427849761024023000000	0.014647886763518338000000
12001	Ardoram	0.010194436620953147857143	0.012449891507539466820276
EKSIPN02	Are	0.015094848186621069326748	0.01568489873571534626156
KWSKEY03	Are 1	0.015299863773515089183913	0.015344069181970365742379
KWSKEY04	Are 2	0.015241601521742417610344	0.015593410262327842072592
KGSSAN01	Aredu	0.012777178621102347729767	0.013542123257781995630395
10101	Arege	0.011638398352770658976279	0.012832286150613078482905
OYSATA06	Aremo	0.014369475530792778469609	0.014702076428200287609121
NISKNT01	Arewa	0.013341855159856795184753	0.014094677450990637425824
42101	Arewa 1	0.014383728170319319766467	0.014374623611827819197605
42102	Arewa 2	0.0143804742935904336224152064888229	0.0145933884209514919634597865252229
NISLAP01	Arewa/Yamma	0.014364458002525403783906	0.014762674407127117700096
BA1512	Ari	0.011503432797978066544208	0.013213025027872229727896
ABSKWU03	Ariam 1	0.015439412379140589998342	0.015660209436166481486714
ABSKWU04	Ariam 2	0.016027864453732817494763	0.015915626494641233331842
ABSEZA01	Ariaria	0.016256693542751105536977	0.014412101590165678187489
KD1101	Aribi	0.014185413220656829820162	0.015462460335976993723302
OGSEWO02	Arigbajo	0.015785574957371958436796	0.016050574549022817435764
ODSANW03	Arigdi 1	0.014852201142710264674490	0.015530453808471904595818
ODSANW04	Arigidi 2	0.014353185407097807848371	0.015075171394475400202048
NASLFA04	Arikya	0.013303868275255655033278	0.014181986210300512506611
JI2101	Arki	0.014780814239742050083235	0.015657967499969196754156
62101	Arkilla	0.013108717156538568647218	0.013459679807196786768413
OSSEDE03	Aro/Ojo	0.014025794270448283000000	0.014584061663752857000000
KWSBDU03	Arobadi	0.011244187161450498000000	0.011648107074540885000000
ABSACH02	Arochukwu 2	0.015411521064956734085008	0.015436674240681797273570
ABSACH03	Arochukwu 3	0.015659189724065058090770	0.015733915692044052187668
ABSACH01	Arochukwu I	0.015391756936735624402321	0.015775072592161845394584
ABSACH04	Arochukwu Iv	0.015348460666867115966254	0.015873845597708772850394
ODSESO06	Arogbo 1	0.014418608940018913132450	0.014928809066795868297812
ODSESO07	Arogbo 2	0.013197294344870773385938	0.013927673359873457630190
ODSESO08	Arogbo 3	0.012821970211138039446937	0.013992053185988896785059
ABSUNC04	Aroikpa	0.015660269056652486860345	0.015507398107026769059770
OYSSET02	Arolu	0.009435815578999184767513	0.012157918370509758169974
OYSSUR01	Arolu	0.014441024193822704623570	0.015183681679970635864989
ABSSSM08	Arongwa	0.015898833246154554063216	0.015722563443353271648649
OYSAKE03	Aroro	0.015799327297264143203544	0.016224102702902146292166
OYSODS03	Arowomole	0.014046876445582138636890	0.014431324325843640178822
LASKSE07	Arowosegbe/Alapere	0.015818307318537577332432	0.014266281667028634136757
NASWAM01	Arum	0.014298435207946010725926	0.015112026327402102896296
ABSABA03	Asa	0.016590558106555929129990	0.014416234968463695665643
ABSKKE15	Asa North	0.015863726022387524970913	0.01585003364849624461055
ABSKKE16	Asa South 1	0.016137716805380010090734	0.016211675840481335108289
ABSGWB04	Asa Umunka	0.016066405545178612149040	0.015851262970293358315519
OSSIDO02	Asa-Oni	0.013252652482033415533443	0.013301585836935376179646
OSSOUA02	Asa/Ajagunlase	0.01479103457659232219890	0.01538857310647573216735
12201	Asaga	0.010854279886795093125634	0.012826792461669073792234
BYSSAG05	Asamabiri	0.015410116751507153733211	0.016505050624999540567920
AKSAFG09	Asang 1	0.01590216556121626542916	0.016026494633743493549925
AKSAFG01	Asang 2	0.015827973952490842981553	0.016008023575626155765360
AKSAFG07	Asang 3	0.015942470976227331335453	0.016117025036935974118104
AKSAFG05	Asang 4	0.015870555576124398209497	0.015995701719459708452514
AKSAFG02	Asang 5	0.016148295439664691373616	0.016248518376827158059706
OYSISE02	Asanike	0.016048050770310504234583	0.014703671998798287676006
ODSOET01	Asantan	0.014620277180390618691113	0.015485043704902880319905
ABSEZA02	Asaokpuaja	0.016633962422328547442688	0.014095397260531340515723
60701	Asara	0.013485504360952289364469	0.015280196499149548259977
RVSNDN08	Asarama	0.014970862147393911854474	0.015884474537145645017699
ENSENU08	Asata	0.01621781754029140813924	0.01471171186328381500000
OGSEWO03	Asayobo	0.008225847532538008000000	0.009031277984156299000000
DTSABH04	Ase	0.013729878620554904000000	0.015796738559296936000000
TRSKRM03	Asha	0.009964899313677536026850	0.011861098591837015568019
GMSFKY01	Ashaka/Magaba	0.014470756398180940831382	0.014879706356646458919732
DTSABH05	Ashaka/Ushie	0.0155995695664454200351653074107073	0.0165824933180452967698910258879552
FCTKWL01	Ashara	0.01392259873484219083821	0.01476598808116430081871
70603	Asheikri	0.01329721574037528367101	0.01456871985252594617752
11101	Ashigashiya	0.01276680768726553577273	0.01481325179472889181818
NASLFA05	Ashige/Ogah	0.012285910753321666557826	0.014052385343022832881194
TRSKRM04	Ashuku	0.008580946312410066000000	0.009350403482983684000000
OSSODN01	Asi/Asaba	0.014848673261198114087479	0.015964895254390886012007
TRSDGA02	Asibiti	0.014525549431109463364709	0.015692087658347794762503
EKSIKE01	Asin	0.015001775265309793303289	0.015428947393656891161998
OYSATA07	Asipa 1	0.014569727394024969472379	0.014708721552009489410826
OYSATA08	Asipa 2	0.013315596710704168000000	0.013818160466567125000000
OYSATA09	Asipa 3	0.010944954709523900082494	0.012344338714901022164152
OSSINH01	Asipa/Akinlalu	0.01509109061006445900000	0.01509466246187668100000
JI1602	Askandu	0.013027178192060634972613	0.014207588554847357847029
10201	Askira East	0.013830996882672550236189	0.015271030654436936067410
NASKRV01	Aso-Kodope	0.015469486158912854591676	0.016025037994670346506289
PLSBSA01	Assak	0.015026245537192856278061	0.015867115226255756714354
NASLFA06	Assakio	0.013265318154687551543293	0.014181713533070280408925
CRSGEP07	Assiga	0.014857813650866143016327	0.01571018349523376565021
KD0701	Asso	0.015038828618341621250833	0.015804362112880033660000
RVSBGM01	Astward 1	0.015284112807866582640612	0.015815627784214422921313
RVSBGM10	Astward 10	0.015266526316786963339286	0.016181968625738568107143
RVSBGM11	Astward 11	0.015035330792024712432077	0.015653529948606501547853
RVSBGM12	Astward 12	0.014084977400426961000000	0.015286137761173112000000
RVSBGM13	Astward 13	0.015297473939797218145665	0.016036570597158953065655
RVSBGM02	Astward 2	0.015102230963942797741176	0.01604077570545905576471
RVSBGM03	Astward 3	0.015681258127080735566265	0.016133806857255180385542
RVSBGM04	Astward 4	0.015771147796585299124860	0.015795060614221269965127
RVSBGM05	Astward 5	0.015271330142272244000000	0.01563814285684938484848
RVSBGM06	Astward 6	0.015415920155519940000000	0.016225000106578270091603
RVSBGM07	Astward 7	0.015247643625715841250145	0.016174896603866104792999
OYSINW04	Asukuna	0.014440076180299018000000	0.01369051026703617000000
OSSENH03	Asunmo	0.015209456870021811000000	0.016115864058124322000000
KGSKAB05	Asuta	0.014327355470789792711683	0.015432258246809834139335
AKSNGD01	Asutan 1	0.016018011155301917776190	0.016627376643387652382540
AKSNGD07	Asutan 2	0.015781946588615577187324	0.016028432444779023371657
AKSNGD10	Asutan 3	0.015919654429765926000000	0.016498814656717188000000
AKSNGD06	Asutan 4	0.016378925419146139049853	0.01689283539080327465352
AKSNGD09	Asutan 5	0.015904227953635789387360	0.016656971416295193407059
RVSNDN10	Ataba 2	0.015235642268142899843867	0.015742454595211784767059
AKSKRT10	Atabrikang	0.0124870328910027000000	0.014456411464221903000000
JI1301	Atafi	0.016097203819701957000000	0.013754335366801648000000
BA1012	Atafowa	0.013080215816606060242085	0.014482882398548005943463
60702	Atakwanyo	0.013442128996211895643674	0.014372005989805805231622
OGSINE01	Atan	0.014617973346180759033850	0.016658639943514548605616
LASAMO13	Atan Lagos	0.016038244726808371401577	0.014349881936506084965615
OGSADO05	Atan Ward	0.015497546039709927676019	0.015882607975457617637643
ANSATN03	Atani 1	0.015271863286958477651286	0.015964267376381812444024
ANSATN04	Atani 2	0.015245440796458218246398	0.015669633225089870387059
OSSOSO06	Ataoja Iv	0.013905177958632554430233	0.013985634389731805853357
OGSION04	Atapele	0.010356440211770353000000	0.011520456875009927000000
OSSOLA03	Atelewo	0.013971884233676031435434	0.013787489053089941918714
BNSUKM01	Aterayange	0.013836054407148073292016	0.015232271517659778045571
LASIKU07	Atere	0.014030505486816972778202	0.015027974512204212513095
EKSIKR04	Atiba/Afin	0.014084977400426961000000	0.01541378796070407000000
OGSIUN04	Atikori	0.013213936187952500669535	0.013592081197518323795181
OSSIRE02	Atile	0.014972846882467310163561	0.015116598210450322200828
CRSKTA07	Atimbo East	0.015897258728160271284743	0.01647358655634822952825
CRSKTA05	Atimbo West	0.01603750016980847561700	0.016613553889616332972717
OYSIRO03	Atipa	0.008699312572367418000000	0.009861004281107508000000
OYSINE04	Atipe	0.01597748401777304776599	0.014870799091367766433133
BNSSEL01	Atirkyese	0.015093657620002817836037	0.016065540328303845304753
BYSYEN01	Atissa 1	0.015830319849873238614914	0.016065766504858209671675
BYSYEN02	Atissa 2	0.015635649850056932618449	0.016061672935681935964361
BYSYEN03	Atissa 3	0.015417592884285095267913	0.015996356630166054744954
LASAGG01	Atobaje	0.014673693798635898947368	0.012874220833193481842105
IMSIHI06	Atonerim	0.016142171922830668172351	0.016099699014304749364410
IMSKED06	Atta 1	0.015873344087509477686801	0.015780029224220141073749
IMSNSA05	Atta 1	0.015916342325958988757074	0.015605263260000501000000
IMSKED07	Atta 2	0.015880551863129608201626	0.015848300245584438519241
IMSNSA06	Atta 2	0.015866373371020775420225	0.015442518013434001281244
PLSRYM01	Attakar	0.014534238679269500189172	0.015233933443481789257019
KD0702	Atuku	0.015282733511565804431328	0.016243868998330594939275
DTSAKU01	Atuma Akwukwu-Igbo	0.015449792044079795761658	0.016172725522511172275167
51701	Atuwo	0.012776636514433582831668	0.014421282894905437081067
KD0501	Auchan	0.013479122474966011118262	0.014072073078353515726635
EDSAUC05	Auchi 1	0.015361746513806101410023	0.015669579322071867471795
EDSAUC12	Auchi 2	0.015136342060933141343425	0.015499326400572491964350
EDSAUC04	Auchi 3	0.015154192389350388451315	0.015658243686047307882668
EDSAUC02	Auchi 4	0.015352010139451062068764	0.015697304625524285159961
50401	Augie North	0.014676808700213723000000	0.016498814656717188000000
50402	Augie South	0.01343396297066152000000	0.015286137761173112000000
JI1401	Aujara	0.013895215409924474838294	0.015058071483979145933807
BNSGKP01	Auke	0.014663224823586497328956	0.015371504500261166658563
NISNAS02	Auna	0.012678604904216411255396	0.014203389762668597497590
11602	Auno	0.013155863251187837995674	0.014453212923075424332986
JI0101	Auyakayi	0.014296084192504105954184	0.015759247829779892497482
JI0102	Auyo	0.014920737365319104952202	0.015238398913726844598192
EDSSGD09	Avbiosi	0.013940848876488891402549	0.015487124720277558763438
DTSWWR01	Avenue	0.015784652835931755671949	0.015096339467387452386433
EDSAUC10	Aviele	0.013756297803357334712721	0.015506475431527478098148
BNSNAK01	Avihijime	0.012842131670874758000000	0.014775536963049292000000
KGSAJK04	Avrugo	0.014810774498223303440034	0.015381562883505406684239
DTSLEH01	Avsiara	0.015037459512967773475637	0.016168895527573635313654
IMSUMG02	Avu	0.016278726934079410321	0.0164604740075009287914
IMSTTK05	Avutu	0.015977353359528759308204	0.016116846604249419278292
IMSKED08	Avuvu	0.015934670272017734066492	0.015892001569095626955381
TRSWKR02	Avyi	0.014914449883479780854577	0.015373851050074453632966
ANSAJL04	Awa	0.01449925931027769600000	0.01496701226234572300000
AKSABT05	Awa 1	0.015949127628495307830545454545455	0.015991312277072891861090909090909
AKSABT08	Awa 2	0.015769466628059760519249622014093	0.016066679021179554054193258777029
IMSGUA01	Awa/Abaziem	0.016095528560410982913031	0.016152386265586817545367
GMSKLT01	Awak	0.012619036277656171793937	0.014017390851238828458821
IMSRRT03	Awaka Ihitte	0.015811106316487150181650	0.015683698924772534721501
OSSISO04	Awala 1	0.014615832142053876242424	0.015527899502709013545455
OSSISO05	Awala 2	0.014499259310277694000000	0.015126575011759417500000
IMSEBM02	Awara/Ikwerede	0.015896531162416681790707	0.016707825740999693038384
ANSACA06	Awba Ofemili	0.013682117623741748558755	0.015175275610053693056959
OYSAFO02	Awe 1	0.014197706539857065601584	0.014480514273595842515471
OYSAFO03	Awe 2	0.012997826865469443140193	0.013938629476497815724764
KWSAFN04	Awe/Orimaro	0.011776835331258586000000	0.012031057673133751000000
ANSAJL05	Awgbu 1	0.01587593972048172716825	0.015237824172466837600449
ANSAJL06	Awgbu 2	0.01599086141857862860257	0.01582153664551327985467
ENSAWG09	Awgu 1	0.015524366725036125261495	0.015767578007472318615368
ENSAWG03	Awgu 2	0.015466415860657474283888	0.015819136321861404542510
ENSAGW04	Awha Ndiagu/Awha-Imezi	0.014978794414720303564103	0.015259953104859072205128
LASBDY09	Awhanjigoh	0.0153870062599578380000000000000000	0.0161796891578898020000000000000000
CRSKAM06	Awi	0.014172780013798698515537	0.015004487550281418887245
60601	Awilkiti	0.012817570671933607510000	0.013628280794764830745000
ANSAWK07	Awka 2	0.015470028083968587029860	0.014696627405143560482846
ANSAWK08	Awka 3	0.015623738779872543000000	0.014775536963049292000000
ANSAWK10	Awka 5	0.015585729019098735627151	0.015520481795601577726985
ANSAWK04	Awka 6	0.015380619905946836464154	0.013790092518037592733186
ANSAWK05	Awka 7	0.015607075568519325126214	0.014461368753524075776699
ANSJJT03	Awka Etiti 2	0.016196216033213643800055	0.014978301091994807702566
ANSJJT04	Awka Etity 1	0.015879988731928975984641	0.014764478698206646937509
ANSAWK06	Awka I	0.015630244265726268278465	0.014946771818495917162068
ANSAWK09	Awka Iv	0.016097203819701957000000	0.015541438160235024000000
ANSHTE01	Awkuzu 1	0.015327823129979164000000	0.015030837362111204000000
ANSHTE02	Awkuzu 2	0.015857616263193986808624	0.015509134389537263124275
ANSHTE03	Awkuzu 3	0.015801288169808574000000	0.01566908835976598000000
ANSHTE04	Awkuzu 4	0.015948784597945269410719	0.015344987000851426767773
ENSJRV12	Awlaw	0.014898486444232350923041	0.015643980891261450955366
EKSIPN03	Awo	0.01547859707062725516163	0.01563413881495482269260
OSSEDE04	Awo	0.014262526790362991000000	0.014392586364456426000000
IMSMGD07	Awo 1	0.01621557007965931000000	0.01592438875882789000000
IMSMGD08	Awo 2	0.01623702323053736824839	0.016063472442391766433581
IMSMGD09	Awo 3	0.016151292281948229338131	0.015884234814571204163506
IMSMGD10	Awo 4	0.01617792365130434404108	0.015933306179477796488863
LASATO07	Awodi-Ora	0.014481921538982104393543	0.013902394910020380048157
KD0803	Awon	0.013347370142236499843318	0.014762516280697277999823
LASAGG02	Awori Oniwaya	0.015102633418285183026007	0.013557948455790028256981
OSSIDO03	Aworo	0.015303453605870296560554	0.015769574243479794702422
IMSIHI07	Awuchinumo	0.015542931758881833255445	0.015717325673708099210791
AKSTTU01	Ayadehe/Mbiabo	0.015472864794084176532047	0.016231187449784116462674
KGSNDG03	Ayah	0.015095419163453855482270	0.015990420577468237796099
JI0103	Ayama	0.013951363716262647805861	0.014839517923864257095238
BYSGBB01	Ayama-Ward 4	0.015219431170009137839200	0.016201194483944767116828
JI0104	Ayan	0.014830943907018712857893	0.015057461611546134434881
OSSISH02	Aye	0.014774972671401408450253	0.015180903930864512986155
OGSWSD02	Ayede	0.0117081943645278689491525423728814	0.0139728551998970130000000000000000
OYSEGA03	Ayede	0.014854358090149754000000	0.014903187162580246000000
OYSOLA02	Ayede	0.010829905251599766000000	0.011265156475948019000000
EKSOYE01	Ayede North	0.014972724350107106000000	0.015732913459531456000000
KGSBAS03	Ayede/Akakana	0.012711751057804618787387	0.013206474510436360130931
OYSIJA02	Ayede/Ikia	0.012072750981151965000000	0.013626685167270693000000
EKSOYE02	Ayegbaju	0.015208811640409260566165	0.015682021340507932167293
OGSSAU04	Ayegbami	0.012720785574317531430309	0.013631543317172460781109
LASIKU08	Ayegbami/Odoro	0.015688354155400041602210	0.016027527919662584221105
OSSEGO01	Ayegbogbo	0.01361589498712329282263	0.01419182983984324537832
OYSOYE02	Ayegun	0.015721369089414916656189	0.016179281883988786362600
EDSGAR02	Ayegunle	0.013812267866425918627626	0.015112233662162211347549
ODSASW04	Ayegunle	0.014609038040529839052356	0.014933786929932282329843
OSSIDO04	Ayegunle	0.014694111866931056431908	0.014989468533787584257995
OYSKAA01	Ayeitoro	0.011776835331258586000000	0.01317990946891235000000
ODSPUP01	Ayeka	0.014965837229383087837006	0.016130244381071844473677
OSSOSO07	Ayepe	0.015214497324661545326578	0.015603634765317991785514
KGSJMU04	Ayere/Arimah	0.011198913241957487255399	0.012768385367992045072162
ODSODI01	Ayesan	0.0126053991509600530000000000000000	0.0143287612646909490000000000000000
OYSIBAN01	Ayete 1	0.012250300371087996000000	0.013243734568677827000000
OYSIBAN02	Ayete 2	0.013702380917367879404945	0.013843734035953123490196
OSSIDO05	Ayetoro	0.010829905251599766000000	0.011520456875009927000000
OYSOLA03	Ayetoro	0.013454263496353513026186	0.014254749290788412376260
OYSOLE02	Ayetoro	0.01198163824553435632721	0.01272472902876525535994
EKSIDO03	Ayetoro 1	0.015594877870808868641975	0.015826287216595766407407
ODSAKN01	Ayetoro 1	0.015000648026887952618636	0.015447122069627038522273
OGSYEN01	Ayetoro 1	0.011525193442785151507839	0.012301372004701434365882
EKSIDO04	Ayetoro 2	0.015586542815881430665034	0.016004883134167028626158
OGSYEN02	Ayetoro 2	0.013313032315628937476366	0.014383150037994249496324
12002	Ayi Yasku	0.011599285941322555000000	0.014392586364456426000000
OGSWSD03	Ayila	0.0134208709911696609875312361231491	0.0142610092904858264624296878211354
KGSKNA02	Ayingba	0.014273272548373480810253	0.015042678044892350583882
LASAMO14	Ayobo	0.014931391668903300626043	0.014425262542410926173623
DTSSAP05	Ayomanor	0.0153776969851301407689306572261341	0.0157465757752367624170115864566611
51901	Ayu	0.011362013843927239275912	0.014071623290779743426104
KD2003	Ayu	0.014485796448984668788139	0.015471169849404540229338
NASAWE02	Azara	0.012503424419150360615709	0.014277925434161319575881
BNSUKM02	Azendeshi	0.014911181262601560577903	0.016030710127120352450885
ANSHAL04	Azia	0.016057993093731721145061	0.015961376927182952534272
ANSUKP05	Azigbo	0.015627016575142021690931	0.014941393289740527726675
10701	Azir Multe	0.012053040951139224649223	0.013224457289496811225457
KN3001	Azore	0.015018163530469879820695	0.015748542038462972130332
EBSBKL03	Azuabe	0.014755081213927213121613	0.015756626500194723916421
EBSNKE08	Azuebonyi	0.015057222307945272919708	0.014981035149228503996350
EBSAKL08	Azuiyiokwu	0.014854358090149754000000	0.016179689157889802000000
ABSKEK03	Azumini	0.015876495164170448942436	0.015854054745134068035800
IMSWER03	Azuzi 1	0.01604360570901743107204	0.01575456253314737697112
IMSWER04	Azuzi 2	0.015975240017895863829771	0.015905836532850302818021
IMSWER05	Azuzi 3	0.01609720381970195700000	0.01598821385859336800000
IMSWER06	Azuzi 4	0.01557015007511573399005	0.01493811632165588224212
ODSOET02	B-Duro	0.014273072904966458349355	0.015219544163528007233294
41802	Ba'awa	0.0153388222124380892731253961006707	0.0177070690759053503110365671791440
OYSSWT04	Baabo	0.011570324943113064971347	0.013523408713223408365134
OYSATIB03	Baasi	0.008821658225158694206271	0.010169860705181989807504
JI1701	Baauzini	0.012153483693487807632607	0.014827363851760131683354
KN2401	Baawa	0.013854926208537096582098	0.014837740033115219427443
BA1304	Baba	0.012556101411399104054117	0.014608132791519402433126
KWSBDU04	Babadudu	0.011776835331258586000000	0.012477833371492095000000
OSSOSO08	Babakekere	0.014266209207300065668728	0.014673621138853189445564
LASMUN03	Babalosa 1	0.017431737543833777226043	0.015841721076600280739561
LASMUN04	Babalosa 2	0.015320530922892504853571	0.013385745415656014553571
NISNBS01	Babana	0.013318961179540582954068	0.014464337507774432989515
OSSESH03	Babanla/Agate	0.010474806471727709000000	0.012222532972430183000000
NISMSG01	Babanrami	0.010601802034186256980246	0.012318354325983521301913
OYSIWU01	Babaode	0.009420896260764990794469	0.011630569696621458722064
OSSESH04	Babasanya	0.015268640000000486000000	0.01592438875882789000000
LASSUE06	Babatunde Ayilara	0.013438744886976641582806	0.012395245286217609366643
KN1701	Babawa	0.015083043766687860482663	0.015464987608693013029638
43201	Babban Duhu A	0.014627379323107435458306	0.015611256030365874638214
43202	Babban Duhu B	0.015091159645343002992788	0.016001293001613957556362
KN3801	Babban Giji	0.016107612439630572681037	0.015115783012481849101971
40401	Babban Mutum	0.013446941368754911173862	0.015206520583014513450986
71501	Babbangida	0.012094181517882293506112	0.013508626665319668944315
KN2901	Babbar Ruga	0.014015435526296418360604	0.014496754902794411341198
KWSLRN04	Baboko	0.015280971794563980321570	0.015082346754276194493378
JI0201	Babura	0.01401026632552089013505	0.01516177751523831649691
KN4101	Baburi	0.013624234288587184403671	0.014543492132950783319655
50201	Bachaka	0.011798981487364912180406	0.013444767266289360337748
60602	Bachaka	0.012891237175887788119383	0.014117377710732077460290
TRSKLD01	Bachama	0.012455419724048744301980	0.013289960371131733450495
KN4201	Bachirawa	0.015787664325744200378057	0.015533767287068136317221
LASAMO15	Bada-Megida	0.016000627590840765101157	0.015390053811174564230573
KN2402	Badafi	0.013762699153861268545935	0.014850628425734392076660
BA0301	Badagari	0.01252132915965485764658	0.01428523101453918272806
12103	Badairi	0.012199728448370034284531	0.013944169830389073928968
BA1301	Badara	0.012556348834235053516978	0.015051442621331958486518
81103	Badarawa	0.014106350248072968997880	0.015665795616103166895406
KD0901	Badarawa	0.015973342895515356757722	0.016211945356439762017467
KWSLRN05	Badari	0.015562485890153102541308	0.01582048291977735085656
NISKHA01	Badegi	0.012459239301991536073272	0.013863185098860263805218
OYSONA04	Badeku	0.014328476475879909346790	0.015062868138975657445931
LASAPA06	Badia	0.015846233635213460584647	0.014562565529515827879282
KD1001	Badiko	0.016123682630990015153277	0.015263770976706311500578
62102	Bado	0.014808660073227002223691	0.015267099443741321298444
LASEPE06	Bado/Ebole/Etita/Iberikodo	0.008995228222260801000000	0.009669528981811074000000
KGSAJA05	Badoko	0.013611512360597551000000	0.014584061663752857000000
LASEOA06	Badore/Langbasa	0.015442266871333643006286	0.015376226538995735675240
12602	Badu	0.011565834606986782830040	0.013365077940168715446640
KN0501	Badume	0.013182588311802149358432	0.013923038563950772263055
KD1401	Badurum	0.013840196791091684548486	0.016145715892065586839591
11702	Baga	0.014021779334494957315641	0.015056736240533625970163
NASKRV02	Bagaji-Agada	0.015828667247498782467817	0.016111755883567710931106
NISSUL01	Bagama A	0.015938607989516330677752	0.015344974866776673313934
NISSUL02	Bagama b	0.016235874941978960818740	0.015628596737090355617324
KGSBJK04	Bagana	0.013817268704008674397340	0.014535299266068399899213
60202	Bagarawa	0.015347738722924367822751	0.015208027996222028653439
50403	Bagaye Mera	0.013773372263056011201342	0.015080955057900202028523
GMSFKY02	Bage	0.013220707441888187235842	0.014405159746539220603680
80102	Bagega	0.011544829787380344018745	0.014813750192335574305304
BA0601	Bagel Bajar	0.012609308385927996494272	0.014274741692726739532900
61801	Bagida	0.013862106774822193844073	0.014984586272661620310974
42601	Bagiwa	0.016060713005858749706077	0.016331529422856733524862
KN0402	Baguda	0.013143691041103883085467	0.013931681244038316204229
50501	Bagudo Tuga	0.014067406428774866235782	0.015188190694436582286118
KN0301	Bagwai	0.013146344291259441180921	0.014015928889107485172549
KN3701	Bagwaro	0.014609828671132711982793	0.01617806196109348092771
50502	Bahindi Khaliel	0.012605620755918903254179	0.014401626534405603922598
ADSMUB01	Bahuli	0.013818546381102571560290	0.015119887080955050957579
BA1901	Baima	0.013112485074706611186212	0.014847962144826321539520
TRSKRM05	Baissa	0.013197230450746816000000	0.013818160466567125000000
LASIKU09	Baiyeku/Orita/Offin	0.016677290068137766881013	0.016799205425691940461624
ADSMWA01	Bajama	0.013944245618176497428608	0.015323041504597447159889
50901	Bajida	0.013082027826159900689374	0.014915898093465744093546
GMSGME02	Bajoga	0.014545689359076264567786	0.015280918233424879139614
GMSFKY03	Bajoga East	0.014584969972456681144776	0.015055217160469616269168
GMSFKY04	Bajoga West	0.014445825207085392666383	0.014754533064457537887850
LASSMU04	Bajulaiye	0.014708751466525225908221	0.013413264704736587907223
62301	Bakale	0.012586550257280982368715	0.014911533402622143607206
ADSGAN01	Bakari Goso	0.013716935174085196300992	0.015559969407322377670761
NISKHA02	Bakeko	0.012239072010707535441719	0.013779749925514409977208
TRSARD03	Bakin Dutse	0.013433280744379345060519	0.014645127753442020512968
BA1202	Bakin Kasuwa	0.014025794270448283000000	0.014903187162580246000000
PLSBSA02	Bakin Kogi	0.014100496398301805797366	0.015347527903040538784469
KN0702	Bakin Ruwa	0.015701368599714704311688	0.014558573068716645633117
40202	Bakiyawa	0.014660309646485997740712	0.015719867864536795137726
ADSYLA02	Bako	0.015395086613497362029520	0.015299738866381439013838
40101	Bakori A	0.013813273030979401000000	0.014262263203648264515832
40102	Bakori B	0.014161804098042065821723	0.014918506029377705320898
ADSSHG01	Bakta	0.011438666688813191149144	0.013865600149522395176039
80201	Bakura	0.015214614631718622540620	0.015408194229656184148695
51804	Bakuwai	0.013273068366666157151275	0.015241149117186534784478
JI1902	Balago	0.013402534055271475246145	0.015356900810125511816471
KN1601	Balan	0.014511178271200859700894	0.014823823325376005939715
JI2001	Balarabe	0.013527890131571808815231	0.015463779287900707478941
KN0102	Balare	0.013696308198048808253298	0.015141549835206322428069
10401	Balbaya	0.009385370076666495974727	0.012008943612016948120729
LASSUE07	Bale	0.015352243561494115513695	0.013577541173081420626606
LASATO08	Bale Alayabiagba	0.015650550343975618492693	0.013974058935722886469729
TRSBAL01	Bali A	0.010410738839852621263287	0.012489536537893536354485
TRSBAL02	Bali B	0.010578376949190389931818	0.01235018317196114000000
60603	Balle	0.012793855512283617711812	0.014241963865566466758194
70604	Balle	0.0120268054433872989535222725158906	0.0133915673183060872384883298976438
BA1505	Balma	0.013294716638567831030160	0.015631182784713621135597
KWSFFA01	Balogun	0.015387316119277098744022	0.015853157888324095165558
LASLID05	Balogun	0.015150273740043133000000	0.013626685167270693000000
OSSADE02	Balogun	0.014203343660384313000000	0.014711711863283815000000
OYSOET07	Balogun	0.014961806352733083665971	0.015334036329350173396350
KWSFUF06	Balogun Fulani 1	0.013493146100640199000000	0.014264936164925471000000
KWSFUF07	Balogun Fulani 2	0.013989056824132981869796	0.014578263774296494376230
KWSFUF08	Balogun Fulani 3	0.013924126532283040383777	0.014691197004716505128261
OYSIJA03	Balogun/Joloko	0.009882975171940943000000	0.011137506276417061000000
PLSTNK01	Baltep	0.013261245376479978810819	0.014317364415981583314635
BA1008	Bambal	0.013324404282490028939323	0.014595584092911426641973
GMSBLG01	Bambam	0.013913737746306118496561	0.015167166424414500442063
LASKSE08	Bamgbe/Elebiju	0.015590760106347758700480	0.013769602645635199770391
42701	Bamle	0.013990979511574689128442	0.016055239726740263268416
51802	Bandan	0.013103425894851304696187	0.015423521415155993117951
RVSBRR10	Bane	0.015120910032339354963171	0.015921671226521548673950
80801	Banga	0.014581585779390225508212	0.016952105980771117707324
NISKUT02	Bangajiya	0.012850881771017537021079	0.013823720701526057993809
GMSBLR01	Banganje North	0.014435911017746020264058	0.016767127492863664869557
GMSBLR02	Banganje South	0.015393647817275734011182	0.016074367547573924952476
RVSBRR18	Bangha	0.015738897509721784767378	0.016217161651023545232548
NISBMG01	Bangi	0.010475634825697736166558	0.012980948105381035934777
60203	Bangi Dabaga	0.012851923134695668068878	0.014638451022253677151519
BA1612	Bangire	0.015137550219880572858790	0.016425645709493249738329
ADSHNG01	Bangshika	0.013690018305984483391380	0.014723783614076210964320
50902	Bangu	0.012943081416989013199442	0.014897223031918758394700
GMSBLG02	Bangu	0.013084256287154151521771	0.014353702796542220999268
GMSSHM01	Bangunji	0.013774764247814036339417	0.015156816056303118105630
KWSKMA02	Bani	0.009211522958114011776734	0.010722426715240114140845
50503	Bani Tsamiya	0.012397113418315742205782	0.013581506014649009392154
50801	Banizumbu	0.014724260888357340600893	0.015696726907432279695536
ADSGUY01	Banjiram	0.013889700708716132375584	0.014607011449459058100067
61101	Bankanu	0.0142137453812210112730226847879355	0.0155944026761235879189325684369845
10305	Banki	0.014846109841264690372893	0.014410297908933089223473
10102	Banowa	0.011136704190679913298922	0.011754626090434433171905
TRSWKR03	Bantaje	0.011771583251309995510560	0.013188681771898089462932
40601	Banye	0.015707090827072778166404	0.016786628066003293329236
BA0302	Bar	0.013942801085819201502709	0.014868945908900164359021
BNSMKD03	Bar	0.015758447423258306634785	0.016035010859660243045930
70801	Bara	0.013748817222148079408254	0.014657936683989345040000
BA1302	Bara	0.011926394011360437008197	0.014273515932434927646721
OSSENH04	Bara-Ejemu	0.01503190748008578000000	0.015796738559296936000000
TRSJAL01	Barade	0.015333083797805593799752	0.015513190243407966655203
JI2402	Baragumi	0.013688011715198366913730	0.014733459248881871782458
40203	Barawa	0.014648866816990533624572	0.016351827210731314658111
80101	Barayar Zaki	0.014086731455870895332602	0.015514640025591451125686
BA0605	Baraza	0.012554601381374505501881	0.014675190501956359658351
51803	Barbarejo	0.013843956453167642882445	0.014984216916937345814716
KD0703	Barde	0.014145731523768991725806	0.015902077771342708077183
40103	Barde Kwantakwaran	0.012692387234563223199214	0.013515090956279529376786
80601	Bardoki	0.012630463122584152925766	0.013501796138053260647147
ADSNUM01	Bare	0.012423660327097319025922	0.014162866912658446116650
GMSBLR03	Bare	0.015480984378904789352312	0.016020297063823073245989
OYSOYE03	Bare	0.015610019463924930831794	0.015810056266138976752119
71405	Bare Bari	0.013482449048116058794756	0.014934276902835366478873
41502	Bareruwa	0.013905243394533732061455	0.014870420743305837618379
60903	Bargaja	0.015996711239970473974657	0.016235224408372117781415
KN2411	Bargoni	0.013284010763030386028102	0.013730516854933941266968
12701	Bargu	0.012829312056803602289705	0.013482156611850742517796
KGSKNE02	Bariki	0.01503320515247372526860	0.01464773682201536319734
NISBDA01	Bariki	0.013637070991408965641491	0.014317436210677853860809
61802	Barkeji-Nabaguda	0.013761315817626790989704	0.015419841772380847741001
42201	Barkiya	0.014580965640392541095055	0.015860385464786713977770
KN0601	Barkum	0.013601031206446642996581	0.014216917748371589478810
KD1002	Barnawa	0.016068900324997153475822	0.015580576206297949509214
NISAGA01	Baro	0.011937224843171881408489	0.012444622472661100575728
LASAMO16	Baruwa	0.015799936492232931365914	0.014576114874563001831287
LASSUE08	Baruwa	0.014064473881614122677903	0.012228748150684497784644
NISWSH02	Barwa	0.01390742801049093000000	0.014392586364456426000000
GMSNFD01	Barwo Nasarawo	0.014023805427994827507128	0.014542269872358559974542
GMSNFD02	Barwo Winde	0.012014761747167095015370	0.012972615845178362120077
BYSNEM01	Basambiri 1	0.015781188238872419147170	0.014689674140157242837736
BYSNEM02	Basambiri 2	0.015209456870021811000000	0.01592438875882789000000
BYSNEM03	Basambiri 3	0.013710150910562011000000	0.014626611730263176333333
CRSBNS08	Basang	0.013584562209159954077203	0.014828324012497699930070
61102	Basansan	0.0147896988269530288468869041162307	0.0155743349848288638137202968345834
KD1901	Basawa	0.014613179396482699855276	0.015003727276142478771130
PLSWAS01	Bashaar	0.012769532842234973905640	0.013824598356239783035792
BA1510	Bashe	0.010638295104184186179249	0.012750678402686421514088
61803	Bashire-Maikada	0.013964798125033393732552	0.015166223422162480578583
OYSIBN04	Bashorun	0.015704269866664131608652	0.014452913658147587131194
LASSMU05	Bashua East And West	0.016175253187621431973799	0.014441361004015196624454
EKSADO02	Basiri	0.015496273669691337803335	0.015212569271022333567329
JI1101	Basirka	0.014113782951247708516684	0.014790752751397308404435
OYSATA10	Basorun	0.008936045092282123000000	0.009861004281107508000000
OYSINE05	Basorun	0.015516280208451373834359	0.014328974407181637404035
NISKUT03	Bassa/Kukoki	0.010285158993823292564322	0.011604231461725584488201
40204	Batagarawa	0.014722669231528676481656	0.014953831835592700324021
NISLMU01	Batagi	0.013445284945420222461008	0.014725453683441667089158
KN0202	Bataiya	0.014358192860149130201996	0.014600628437309533716096
NISLMU02	Batako	0.013217464974117348817736	0.014453332005256255921472
JI0202	Batali	0.011991364240731865786293	0.014423881934452174046649
NISKUG01	Batati	0.011498294545212153730122	0.012827895501245563741590
40302	Batsari	0.015034992076853259274959	0.015235604012968711011350
JI0401	Batu	0.010680525997767121662882	0.012159822721568906637555
JI1801	Baturiya	0.013935278210525400445450	0.014662334023383524707707
KN2403	Bauda	0.013302779750416473978591	0.014375152622543494358681
GMSKLT02	Baule Central	0.01413909840418781998627	0.01532421715015674027138
42301	Bauranya	0.012820676095954841473724	0.014762217787622223526276
40402	Baure	0.014080743925088889901373	0.014779618264587763705564
40501	Baure	0.015663619213359073467983	0.016195043849754386138839
43203	Baure A	0.014882336201427166606596	0.016014243092383328597664
43204	Baure B	0.013415554249895017650962	0.014849159119965927938380
70209	Bayamari	0.0099349642423598140145867098865478	0.0116855538915831895937331172339276
OYSSUR02	Bayaoje	0.013804157076025464001828	0.014664116008691582045954
50404	Bayawa North	0.013250390208917012279290	0.015348980936326814572781
50405	Bayawa South	0.009882975171940943000000	0.012541658471257572000000
ADSMCH01	Bazza Margi	0.013985817590056797900296	0.015271204879075192464372
KN0403	Bebeji	0.013495291636860302334808	0.014422956685888761555851
ADSMDG01	Bebel	0.014164681021307373026568	0.015981024451595525317645
CRSBNS02	Bebi	0.013967705518380311155819	0.015258952749038036929352
CRSBNS03	Becheve	0.013211453135295354439766	0.014905200168786429608649
52101	Bedi	0.013523639936055060949722	0.015276960150524176906396
CRSBJE11	Beebo-Bumaji	0.012811675104888107324374	0.013431478482022170125843
OYSISE03	Beere/Mapo	0.015380288916618820842689	0.014274371187261745982741
RVSBRR11	Beeri	0.015389917910578229903677	0.016479610936901684441740
CRSUDU06	Begiaba	0.014774415825926357634365	0.015633241619219523553801
10702	Bego Yerwa	0.008845377288888050681520	0.012180412460058506545936
NISMAK01	Beji	0.011637236301830368577257	0.013237185638837090150652
JI0902	Bekarya	0.014226330142997020216185	0.015343400198155820404319
80501	Bela Rawaiya	0.014789959383029311246373	0.016275289090665976108139
JI2702	Belas	0.011484367242334835281553	0.013787797069591315553398
ADSMAH01	Belel	0.0125370464694707215876009112761168	0.0142416042669402211364764751551772
BA1606	Beli	0.014115174822854192403575	0.016106183235804548165063
KN3401	Beli	0.013363112915418231054560	0.014265088674124431056949
PLSPKN01	Belning	0.014669374525062468213517	0.015309216046710971193285
51902	Bena	0.013564780490104369446717	0.015396500370879664068727
ABSBND03	Bende	0.015426131007972021813069	0.016127676510563933635643
CRSEFE04	Bendeghe Ekiem	0.014413557938968336608267	0.015728989906127560993936
CRSBNS09	Bendi 1	0.014461119070958103310394	0.015622786566961202672401
CRSBNS01	Bendi 2	0.014080327526615736189633	0.015633767199943988960742
62302	Bengaje	0.014613971865064551791497	0.014704314545372731343623
BA1303	Beni	0.014242983826839900146580	0.016388160228866455180375
NISSRP01	Beni	0.012838442835683141802140	0.014696559944149736852818
11401	Benisheikh	0.013910337641358084116109	0.014155445408005612889121
TRSKRM06	Bente Galea	0.012344009938745440869920	0.013212195778492410691328
OYSINW05	Bere	0.015801288169808574000000	0.01452023656398738000000
NISBMG02	Beri	0.011452334933236192536103	0.013477562350939154973736
51307	Besse	0.013745325575449925057807	0.015392115153887185022329
TRSTTM01	Bete	0.014499259310277696000000	0.01624351425765528000000
RVSBRR03	Betem	0.015541968429591378550317	0.016125886460761575527178
CRSABE04	Beten	0.015336413942583348631030	0.016025613616018882289357
ADSFUR01	Beti	0.0133135359250900179721004954681799	0.0146623592231724999667744854632306
BA1402	Beti	0.013786551059931345531182	0.015471153077774237915079
ADSMUB02	Betso	0.013883338419906879828954	0.014676245035134054067307
CRSAKP01	Biakpan	0.013872097777754926107926	0.014998332842500452030354
KN0502	Bichi	0.013134759369102658045076	0.014099248784726199668182
BA1207	Bidir	0.013389563477110174817400	0.015532216959971034662067
CRSGEP10	Biko-Biko	0.015947745961506957493088	0.016021744095336521815668
TRSKLD02	Bikwin	0.012419031022877584248550	0.014324395822752790036641
11801	Bila Gusi	0.012751224433474430354152	0.014140089538754151991078
71001	Bilal Jawa	0.012630225577667907798030	0.013805623976544410916264
81301	Bilbis	0.014374004626835592011988	0.015705117936007613489732
11201	Bilingwi	0.014395164159676903418440	0.015285232440609064028369
BA1007	Bilkicheri	0.013173345332377802274336	0.014629003390937903775275
ADSDSA01	Bille	0.013539270987225154780457	0.014372365113690552296417
GMSBLR04	Billiri North	0.013905731127302543688707	0.014358713125435192243417
GMSBLR05	Billiri South	0.015078137291009839899702	0.015676707977794289421765
40502	Bindawa	0.014175967249161468460944	0.014858888700334557758747
70311	Bindigari Pawari	0.0137298786205549025526430755788554	0.0145017080455102467542595019659240
81001	Bindin	0.013507183455557958286671	0.014872166535696612874310
BNSBKB01	Binev	0.013949761637405771590679	0.015413529297685769071935
81002	Bingi	0.013143352265387791091342	0.015002128698609269082197
80502	Bingi North	0.012410880564878218874458	0.014205563052968358874618
80503	Bingi South	0.013443430095959009032274	0.014816923793932518420053
60101	Binji	0.014423142278946737890173410404624	0.015356926437574853192196531791908
62303	Binjin Muza	0.013272465501314169234167	0.014815441046154747151511
ADSMWA02	Binyeri	0.013337090014054511688131	0.014582206923272748348949
PLSDNG01	Birbyen	0.013848244880512256000000	0.01541378796070407000000
42202	Birchi	0.013687774636044120373702	0.014869618251976950654671
BA0107	Birim Gigyara	0.010883700160853176929649	0.013343447394096056948314
GMSNFD03	Birin Bolawa	0.014094728737251059633720	0.016179863603141374890343
GMSNFD04	Birin Fulani East	0.012780594589125766705458	0.014543264078164310109782
GMSNFD05	Birin Fulani West	0.012889754362797600280000	0.014539937244781657642667
71503	Biriri	0.009854900415967834356011	0.013679030076677609108108
60501	Birjingo	0.012079263735328318968517	0.013787532526847705618984
JI0301	Birnin Kudu	0.014098070933232021052101	0.014782353425193839649198
80302	Birnin Magaji	0.014815632895596854682639	0.016429793598875687757684
80602	Birnin Magaji	0.011369662139198332128115	0.012811624341986293321641
NISLAP02	Birnin Maza	0.013187334535469557932213	0.014025008972408965215812
50903	Birnin Tudu	0.012875874330456646577357	0.014639768279921644701398
80204	Birnin Tudu	0.014758097842162796451829	0.015237504416220438258114
80603	Birnin Tudu	0.012698458105948953891925	0.014189306545280855381525
50406	Birnin Tudu Gudale	0.014325744243563243998015	0.016048617493712252084712
51501	Birnin Yauri	0.011538978553762688067387	0.013796874507155325297404
81104	Birnin Yero	0.013631679280529289733714	0.015055388056448006826503
KD0402	Birnin Yero	0.01230562355506366899259	0.01368079146494363754016
62304	Birniruwa	0.012771868291225185098655	0.014060295149982346093049
JI0402	Birniwa	0.013317029493981646354314	0.014455103533813681901931
BA0207	Birshi	0.014928450948819271665975	0.015470329877911142151329
NISKHA03	Bisanti	0.010954691160484577618852	0.013164687766959962323790
BYSYEN04	Biseni 1	0.015330710276896939348373	0.01668164188479004615397
BYSYEN05	Biseni 2	0.015305250143965333372954	0.016123978550012222039566
KD0804	Bishini	0.013767475209283080267778	0.015234982428134718928463
CRSBNS07	Bishiri North	0.014285712372238807972297	0.015617655660636775884376
CRSBNS05	Bishiri South	0.015129742578748941039900	0.015665385133522744116140
TRSKRM07	Bissaula	0.011956798819549384915233	0.012708482393589135889101
CRSBNS06	Bisu	0.013908520279179805280979	0.015117235632754187895292
11102	Bita Izge	0.010599964901508446359508	0.014075333845816907857283
TRSTZG01	Bitako	0.013542181231651336973937	0.015415188785938977201646
KD1402	Bital	0.014005737422436741663399	0.015145123557436831699270
NISBMG03	Bobi	0.010191760124119968224212	0.012553894484541752833476
ADSGUY02	Bobini	0.014313913936291783974776	0.014396056675374167825112
10802	Boboshe	0.012205081437463410525585	0.014356549354626512276998
60301	Bodai	0.014617395703749767608359	0.015116658896752747146914
KWSBDU05	Bode Saadu	0.010287798388874994902913	0.011827284483068465133682
OSSOUA03	Bode-Osi	0.01433028967659785717630	0.01517208169395816440607
ADSGUY03	Bodeno	0.012987959949825550925520	0.014084512592485920389716
60204	Bodinga Tauma	0.014502985485167774078245	0.014853576683600459101465
ADSSHG02	Bodwai	0.013836909129078055296031	0.015146347189059638329694
ADSGMB01	Boga	0.013395437330771283460983	0.015029876927650184603169
71104	Bogo	0.011461345412509855611407	0.012452998709682729020247
10306	Bogomari	0.011780820006216749950156	0.014678571796345097868120
BA0303	Bogoro	0.01463162130699591761054	0.01539410746279554829192
12202	Bogum	0.011694774027216937275502	0.012297888378310575136825
GMSSHM02	Boh	0.015386072772103285176656	0.016203044714901773671924
BA0304	Boi	0.01445901791784026066974	0.01533953986821523767308
CRSBJE10	Boje	0.013430622436514088136720	0.014211878673712462635309
GMSKWM01	Bojude	0.013248059411528789350058	0.014768413365616514800784
KD2004	Bokana	0.014728768453302695626325	0.015912016508719504851282
NISMKW01	Bokani	0.012405213722075007301801	0.014035218911343576148586
PLSBKK02	Bokkos Central	0.014487362330196092237893	0.015782166285455382993649
PLSBKK03	Bokkos West	0.015315943365172677123633	0.015425239618637879828147
42302	Boko	0.013875792282600620678551	0.014170261246676634515410
81402	Boko	0.014289089385962142656727	0.016126981299838629513115
NISAGA02	Boku	0.011938470633426873948722	0.012288392563337814780727
GMSGME03	Bolari East	0.011300797111864885086957	0.012561083501620978391304
GMSGME04	Bolari West	0.014242059065631113927722	0.014463126822385700448307
ADSYLA03	Bole Yolde Pate	0.0155194367716530142966800618991087	0.0158420240425039364735797641734412
71406	Bolewa A	0.013078864190789463000000	0.013938334236409154802713
71407	Bolewa B	0.013526110839759508893936	0.012648896875622887484672
RVSGGU07	Bolo 1	0.015446189389936516000000	0.016052038958358845000000
RVSGGU09	Bolo 2	0.015510171152075625451737	0.016413550237725469671815
RVSGGU05	Bolo 3	0.016070533563630552744438	0.017016616378062655225384
RVSGGU06	Bolo 4	0.015595017762991438863025	0.016645730813719830512852
12401	Bolori 1	0.013836762224010340045939	0.014344496226751305790748
12402	Bolori 2	0.014370140607232194218287	0.014758025822414906509343
OSSIAE02	Bolorunduro	0.014930887200514871099108	0.015457055855260425537511
KGSKAB06	Bolorunduro/Odoakete	0.013966611140469608000000	0.015222312661407635000000
DTSBUR01	Bolou-Ndoro	0.011082558379578909836257	0.011730967730376766502924
DTSBMA04	Bomadi	0.015313082453182774192675	0.016380596948109961117802
KD1902	Bomo	0.014231130642885793714702	0.014757905313837196784260
KD1302	Bondong	0.015249637165600946613070	0.015993602012386867023794
OYSOLE03	Bonni	0.010630905441455474689202	0.011867467211772820325763
KN0602	Bono	0.013694103643871708616990	0.014333671289302120625912
NISGWU01	Bono	0.012660143546190327727273	0.014716208631676382697727
11402	Borgozo	0.011007454641535793000000	0.01656263975648267000000
RVSBRR08	Bori	0.015263526231950086587636	0.016371878789911223882346
BNSUKM03	Borikyo	0.014458868203660273141728	0.015467088063484243583255
42501	Borindawa	0.013544452494047166958545	0.014826318533335424748364
KWSKSB02	Boriya/Shiya	0.010176828840224585148818	0.012024386539890021189311
70602	Borko	0.010646255270720955167927	0.012852858838513833450213
70507	Borno Kiji	0.012012827621342194232381	0.011504251134749873390701
12003	Borno Yesu	0.011099270073758352989975	0.012427285172179084694236
ADSDSA02	Borrong	0.01230948350106667000000	0.01235018317196114000000
12104	Borsori	0.01390742801049093000000	0.015860563659062413000000
NISMAK02	Bosso 1	0.010377111128015624542378	0.012546988788499705824278
NISMAK03	Bosso 2 Central	0.015576894021595349314638	0.015615792313655922926680
LASLMD08	Botanical Garden	0.013044240925376866842530	0.012127229053651008812376
RVSBRR06	Boue	0.015233535438863976413813	0.016244773719867714069646
RVSBNY01	Boward 1	0.015209456870021811000000	0.01624351425765528000000
RVSBNY10	Boward 10	0.015472317059358539403010	0.016543855111735637610368
RVSBNY11	Boward 11	0.015518318829598027250000	0.016355208182244864500000
RVSBNY12	Boward 12	0.014286743214484282258126	0.015113822195458286760994
RVSBNY02	Boward 2	0.014499259310277696000000	0.014967012262345723000000
RVSBNY03	Boward 3	0.015352660640265297222951	0.016481655121698272603279
RVSBNY04	Boward 4	0.015159510886020468790055	0.015494098272701789904696
RVSBNY05	Boward 5	0.015288373583083581612385	0.015779941480347043874367
RVSBNY06	Boward 6	0.015169355698481431577741	0.016397383933521970641571
RVSBNY07	Boward 7	0.015473390001480897527567	0.016300316776339145924905
RVSBNY08	Boward 8	0.015427724102646130177332	0.015956006668804039447947
RVSBNY09	Boward 9	0.014480816975156861770538	0.016250565755929650271955
DTSWWR02	Bowen	0.014746114060435285619414	0.014233761193237246821263
60502	Boyekai	0.014377988631926104348699	0.016058447244449952109961
NISGWU02	Boyi	0.011776835331258586000000	0.013307559668443304000000
BYSBRS01	Brass 1	0.013395442280076896232544	0.013243853942305817266833
BYSBRS02	Brass 2	0.013182521873257026405697	0.013876656358591872028487
BYSBRS03	Brass 3	0.012113000525056957044492	0.013031840646363200309322
ANSFGG01	Bridge Head 1	0.015476479763319187248351	0.013660858573352026920527
ANSFGG02	Bridge Head 2	0.015091090610064459000000	0.014584061663752857000000
ANSFGG03	Bridge Head 3	0.015387006259957838000000	0.014775536963049292000000
10402	Briyel	0.013575506748027602057805	0.014315904084707751810179
OSSENH05	Buari Isibo	0.015209456870021811000000	0.015732913459531456000000
TRSTZG02	Bubong	0.014221345914692696431487	0.015318329429567946443149
50408	Bubuche	0.013538878519260083681818	0.015370270847227606590909
CRSBJE09	Buda	0.0144131410773478247781098509835455	0.0149534645079119869338772917037490
KD1202	Buda	0.01343396297066152000000	0.014328761264690949000000
KWSAFN05	Budo-Egba	0.013197230450746816000000	0.01317990946891235000000
JI0801	Buduru	0.013041187613469294152325	0.014145532244989658625289
70901	Buduwa	0.012783823110519294886877	0.014004643522219306254913
CRSBJE03	Buentsebe	0.013896189305733522639383	0.014368196698175604878859
41201	Bugagadi	0.013684413924551146184713	0.015552796192006564694773
41601	Bugaje	0.014910582255931592782263830602597	0.0169126655651842077090537925207783
BA0306	Bugun	0.01290131480085343600000	0.01394581066609808200000
PLSBSA03	Buhit	0.015212190827775102106716	0.015753617918952689148262
50203	Bui	0.011996228977225448507030	0.014139941529086334540316
42602	Bujawa	0.015697209402954532045902	0.016586305253447334523637
JI0502	Buji	0.014283542879273936477628	0.016603800391359168131919
PLSBSA04	Buji	0.012546216020981375000000	0.014775536963049292000000
80402	Bukkuyum	0.012256323432988479470233	0.014016002871552149810941
BA1603	Bukul	0.013238245472419751912426	0.015383557839532331765003
PLSBUU01	Bukuru	0.016378868452304302258006	0.015514498778383511485870
BA1708	Bula A	0.011752203646118041395054	0.013726138732710871509844
BA1712	Bula B	0.011013442113125072304418	0.013242079424203905693137
11103	Bulabulin	0.01237249832253523814913	0.01225190737576550734627
12403	Bulabulin	0.01325435736926097670997	0.01208813389528052167221
71302	Bulabulin	0.013622554801209380097426	0.014701328552016821039522
JI1501	Bulangu	0.012706510854072311900458	0.013960351411442403319867
71307	Bulanguwa	0.012103108132187148277840	0.013774186480508234372328
70803	Bularafa	0.009598649426425977850897	0.012605480765397013061525
71702	Bulatura	0.009778076225204838848694	0.011512027155645649128398
GMSKLT03	Bule/Kaltin	0.0123094835010666700000	0.01483936206281476900000
BA1220	Bulkchuwa	0.013919459661152498081158	0.015127875989411740620062
71601	Bultuwa	0.01081903634334313270248	0.01231689878062422298655
DTSPTN03	Buluangiama	0.015339569927054303349166	0.016301324853574730807722
JI1802	Bulunchai	0.014351420105303328885141	0.014785236336061813515936
PLSRYM02	Bum	0.013931703891649177355415	0.014765416577217935228721
12702	Buma	0.013019681060810789000000	0.014137285965394514000000
50802	Buma	0.012981326440108438339631	0.013735378526976753485062
KN2601	Bumai	0.011092099487180036358708	0.014108870177032951464821
42401	Bumbum A	0.014277314923734798989929	0.016500257829959355420422
42402	Bumbum B	0.012899908123748378397577	0.015489056942809964173160
70804	Bumsa	0.013611009476859016244822	0.014488815497878724815189
BA0602	Bundot	0.014657764296987767048057	0.015418232561205280690384
11704	Bundur	0.011954384721194613000000	0.014073460865629037000000
80504	Bungudu	0.014076714277123609587285	0.015976751691371137018026
70701	Buni Gari	0.011294452152723600586795	0.013185272452208903138387
70702	Buni Yadi	0.01333185581234666229887	0.01464743834361366110755
60102	Bunkari	0.013320559271292443336956521739130	0.014551752684679029108695652173913
KN0603	Bunkure	0.014189145479132464362813	0.014888453164967255582869
NISAGR03	Bunsuru	0.012901314800853436000000	0.014137285965394514000000
JI1201	Buntusu	0.012901703966604431790592	0.014443917628304229769347
BA1711	Bununu A	0.012250300371087996000000	0.014456411464221903000000
BA1713	Bununu B	0.012345532693222051225620	0.014899968567287397304397
BA0603	Bununu Central	0.014359066346021952094896	0.015371299073297288218548
BA0611	Bununu East	0.013957475596944978826519	0.015126371541103484828336
BA0604	Bununu South	0.011991728396008323704079	0.014771259311854122863037
BA0612	Bununu West	0.012671916213472110178674	0.014845064016972492449568
CRSBJE08	Bunyia	0.0151760706531874498649966209734778	0.0160617280822334774698646222808112
50702	Bunza Dangaladima	0.014314445565037423448169	0.015310068059022263783394
50701	Bunza Marafa	0.014662767429015425094216	0.015073982812014855866915
GMSSHM03	Burak	0.013273986513442559901269	0.014406728646881294378929
10501	Buratai	0.011888057796993819126706	0.013732843960499685852932
41901	Burdugau	0.014284368690686600282205	0.015292441691174823137220
KN2801	Burji	0.013763848366641334786584	0.014825218713180617146333
BA1508	Burra	0.012730127897507404691007	0.013518022827034403649763
BA2001	Bursali	0.011902147852931113362327	0.013837949999612311017556
KN4102	Burun-Burun	0.013476825535359101502524	0.014408603209220256668022
CRSBNS04	Busi	0.014676808700213723000000	0.014967012262345723000000
BA1205	Buskuri	0.012121408053444053252505	0.013731056472698810076653
NISNBS02	Bussa	0.012807646344636108310309	0.014075375557644548967899
10111	Busuna	0.014953138124984644714789	0.015796395249582809431346
KN3301	Butu-Butu	0.013227652335467774182748	0.013575647098474680114509
PLSBKK04	Butura	0.014558807590820771391647	0.015469357627988069641686
BA1006	Buzawa	0.013920451381540926865234	0.015084149603647079296875
ADSNUM02	Bwalki	0.011839048303302830641254	0.012374711136858879146083
PLSQAP02	Bwall	0.012716937206152585367321	0.013785595371408418719162
FCTBWR01	Bwari Central	0.015536839341233558674377	0.016073731111691257428183
KWSKSB03	Bwen/Kiyoru	0.01343396297066152000000	0.013499034967739739000000
PLSMGU02	Bwonpe	0.014710979301937412635451	0.015996717875238937944607
FCTBWR02	Byazhin	0.016196778971808935821072	0.015774453462444118442116
DTSASB02	Cable Point	0.016203158629938009789542	0.016255349413431417356033
9008_01	Calabar Municipal	0.016062567414192027659282	0.015849495070838548153066
BYSBRS04	Cape Formosa	0.012422392209605021763689	0.013734630797914592580645
NISKNT02	Central	0.012782948540896084000000	0.013307559668443304000000
AKSKET01	Central 1	0.015986527656908626302773	0.016017113674314386444359
AKSKET11	Central 2	0.015894121945588626141989	0.015883632561104043088331
AKSKET10	Central 3	0.015807794997980954587209	0.015817557143538375074557
AKSKET08	Central 4	0.015926724706671281302267	0.016070658163359720068327
AKSKET03	Central 5	0.015679610751411704087898157314512	0.016291329793155560038881891187164
FCTABJ02	Central Abaji	0.014972724350107106000000	0.014903187162580246000000
AKSDUU09	Central Uruan 1	0.016023819621993926308892	0.016595461872342575457247
AKSDUU08	Central Uruan 2	0.014841569665899167811920	0.015981310477590385748680
AKSDUU04	Central Uruan 3	0.015842052902392882223090	0.016306520630541445248187
FCTGWA01	Central-Gwa	0.015614608979201414591860	0.015846574087776607574419
NISMAK04	Chachanga	0.014696410461147504851181	0.015787047779160752327424
62203	Chacho-Marnona	0.014123437909047156289659	0.015233879473700328924960
JI2301	Chaichai	0.013355668116842278718314	0.015116566461440450444567
PLSMGU03	Chakfem	0.01390742801049093000000	0.014711711863283815000000
KN2501	Chalawa	0.015176120854918373693111	0.015710985947975204175431
OYSISE04	Challenge	0.015631309020093900428101	0.014387979671480972338224
12204	Chamba	0.011148566979998860236213	0.012937286871512004373109
JI0602	Chamo	0.013167457957175344840709	0.014347196071175550705972
TRSTTM02	Chanchangi	0.014252522341107044007682	0.015279690920115628921859
PLSMGU04	Chanso	0.014650078443050926021219	0.015417928925711350358187
40602	Charanchi	0.014712337985242462735300	0.014946111391411252710664
51001	Cheberu	0.012988323681771748264201	0.014520612336795611609668
KN2101	Chedi	0.015764650994107489306122	0.014777707884810022510204
81302	Chediya	0.014835879421129638129522	0.015799186265727882864689
NISBDA02	Chenian	0.014022293699599124092891	0.014118078092359244251240
50202	Chibike	0.013891474591102046889777	0.016372914088704648094803
FCTKUJ01	Chibiri	0.015163867744619091561730	0.015686512831937923019407
KD1903	Chikaji	0.014528733052803064103216	0.014589632920547089414089
KGSKKF02	Chikara North	0.013587982294457840667011	0.014689588656746821689425
KGSKKF03	Chikara South	0.013468745458224408671508	0.014456411464221903000000
11104	Chikide Jahode	0.01330567414228512499107	0.01470727956468898904663
ADSGUY04	Chikila	0.013958303167810136194780	0.014861060795357100355489
KD0201	Chikun	0.012249460705555134369754	0.014420802394239689508593
60604	Chilas	0.011325588542882964046512	0.012574472206103777189369
71201	Chillariye	0.01183601846123726000000	0.012796958870319484000000
NISPAK02	Chimbi	0.013035143336382111675071	0.014697822150427742423097
60703	Chimola	0.0144420779807170985656509992175150	0.0153943450284235843325349835973744
ENSENU02	China Town	0.01609720381970195700000	0.01515848756164215800000
BA1208	Chinade	0.015336648396918615849769	0.015928876136259843327693
BA0901	Chinkani	0.015092337528639254082432	0.015820221416836660399312
PLSPKN02	Chip	0.014927385700602237270862	0.015567631771629884837209
KN2502	Chiranchi	0.015948046660586141208057	0.015134976048997218807604
JI0503	Chirbin	0.012101927261762247254787	0.015012627369428954509886
KN0604	Chirin	0.012489400669274874775926	0.013579270485679398926888
KN1501	Chiromawa	0.014329719415282155772367	0.014616335624166546223669
RVSKHE10	Chokocho	0.015703259755204716817869	0.016246365550771950316151
IMSETU02	Chokoneze/Akpodim	0.015810635174301984106825	0.015913971724254478332769
TRSWKR04	Chonku	0.013583916881739997943210	0.015184823694807021297132
KD0601	Chori	0.015794654759126644605982	0.016347832507023337335828
PLSBUU02	Chugwi	0.014787713724280256199552	0.015330496025860301489720
71204	Chukuriwa	0.012336786714785076467376	0.013675819203258499473988
JI2602	Chukuto	0.012300359755892513426569	0.014146001223623322847122
JI2603	Chukwaikwaiwa	0.014351329978925489950121	0.015643563916998344532461
KN0103	Chula	0.013873751819511838041892	0.015576148036250463755319
52001	Chulu Gumbi	0.011599285941322555000000	0.013243734568677827000000
NISKAG01	Cikin Gari	0.011316029353291099644998	0.012948161500593011905411
KN2802	Cinkoso	0.013388741409906591880800	0.014225799649800568374497
NASLFA07	Ciroma	0.015709080125822159182656	0.015514347653566465705591
FCTABC01	City Center 1	0.015761507117060179425187	0.015138387039969939429353
BNSMKD05	Clerk/Market	0.015802100640828791482633	0.015471880835995074603870
LASSUE09	Coker	0.014760427310283527073206	0.014025779834538363272489
OGSIFO03	Coker/Ilepa	0.015671932660622496277798	0.015896445565905930336657
CRSDUK03	Creek Town 1	0.015484158763404598072661	0.016304735524792285032349
CRSDUK10	Creek Town 2	0.015670983536354089493410	0.016546875505480420381089
JI1702	Daba	0.013265397570784169431280	0.015302109608277759735015
40801	Dabai	0.012397222004501283293272	0.013101864578176213785439
52102	Dabai	0.013416902035102231865448	0.015702645248040471250679
52107	Dabai Seme	0.011622038998647080083547	0.014867526388086823399156
40205	Dabaibayawa	0.014818468561625785167929	0.016277677812520045484511
GMSKWM02	Daban Fulani	0.013233897836805130200630	0.014637340192335654507839
KN0901	Dabar Kwari	0.013141218739166028632167	0.014072360404703346662391
41202	Dabawa	0.013500299802192588289066	0.015129211499553517054244
JI1703	Dabaza	0.011430766637787378185050	0.015026071693784276096516
NISKUG02	Dabban	0.011808908369203004605870	0.013767180669899103707547
JI1202	Dabi	0.013661790536653738713313	0.014829561056782671016099
JI2302	Dabi	0.013664550061294757075122	0.014726620396981384355790
KN0104	Dabin-Kanawa	0.013448214268360386947200	0.015277100127046321842400
10910	Dabira	0.011283282056681161167114	0.012701026825430255786869
71308	Dabule	0.013001113804346888441176	0.014326884055874317235294
JI1603	Dabuwaran	0.012647914079319425220844	0.014397100050171850091811
51304	Dada Alelu	0.014056269165735811665672	0.015060082594391802088060
KN4001	Daddarawa	0.014055957213775929969938	0.014885969034376634381184
NASNBB03	Daddare	0.014707331451377141221177590634986	0.015989116078449116217840118137180
KD0602	Daddu	0.015314726957160182311624	0.015910126553960604069886
KD0902	Dadi Riba	0.016044390616518422002853	0.015426033817723236867753
KN1101	Dadin Kowa	0.012464718926346105903794	0.013323797015978491549797
PLSMBD01	Dadin Kowa	0.012954185063634386653333	0.013966234698023035173333
70703	Dadingel	0.01000134143189829500000	0.01554143816023502400000
GMSBLG03	Dadiya	0.013330907224492884801883	0.014772411475158410388412
FCTKWL02	Dafa	0.013748847625409294792253	0.014650804086340623456998
PLSBKK05	Daffo	0.014131526085795346206435	0.015073467372381990898309
BA1209	Dagaro	0.013691866514645803798162	0.015273325810999601773162
BA0406	Dagauda	0.014368624573956603397181	0.015413047039147919301824
62307	Dagawa	0.014112303754487588270555	0.015148328280877543940462
OSSIDN02	Dagbolu	0.014040824268226581517253	0.015140458831668822811132
70101	Dagona	0.013942441485665390695845	0.014994539368188686655050
BA1903	Dagu	0.014248410672788570204947	0.015123643116717187908127
KN4402	Dagumawa	0.013451612686378074458571	0.014046783215743835037571
KN0203	Daho	0.014504243491235822942103	0.015697627881954290379152
11501	Daima	0.010711538991642414000000	0.013881985566332605000000
BA1709	Dajin	0.013112976431217283636845	0.014012626178875244179203
JI1604	Dakaiyyawa	0.014384917007902574752092	0.014749532908280825046548
KN1502	Dakasoye	0.014643301001838158110189	0.015172653241018310584394
KN3101	Dakata	0.014812618260807171146260	0.014876848528750646910810
51805	Dakin Gari	0.014747105508134307227764	0.015941473257056469031362
80205	Dakko	0.013905964806084591244686	0.015514287309359330697044
ADSGRE01	Dakri	0.014729743208499547224182	0.015660742168849769371847
ADSHNG02	Daksiri	0.012419443725479532451989	0.014335574901677152951708
KN1401	Dal	0.013585415838896096201215	0.014800674385184766532584
11312	Dala	0.012996941596699186487947	0.014275006450936676976625
KN0703	Dala	0.016551474330889634196560	0.014434300066023052530713
KN4103	Dalawa	0.013636464374445814265601	0.014419968427538338734009
51002	Dalijan	0.015036179122208559213798	0.016038916448092856069672
KN2701	Dalili	0.014787032722576473527721	0.015465654045369752459446
40503	Dallaje	0.015219145334747306231765	0.016102578243203098425927
BA1902	Dallaji	0.011499035493102578210976	0.014078987185242876765854
11603	Dalori	0.013156255314429427989408	0.014258686244660712137438
11604	Dalwa	0.012013567851173291000000	0.014264936164925471000000
80901	Damaga Gamagiwa	0.012697725180874465354445	0.014246720591735221076207
70502	Damagum A	0.014278442165631660524229	0.016271177074065950287572
70510	Damagum B	0.012128834508195211437064	0.015017180863922899179604
71105	Damai	0.011270912362229543102678	0.013074898265377132550335
70302	Damakasu	0.009942158301919620000000000000000	0.0118395823738373170000000000000000
KD1403	Damakasuwa	0.014024576135967177457742	0.015641353637336411959946
12301	Damakulli	0.011615699117173597821626	0.013505088976572871084006
12603	Damaram	0.012368666631045348000000	0.014328761264690949000000
ADSGRE02	Damare	0.015600921325806332395813	0.015676424720332160257027
43102	Damari	0.013546616537486414182084	0.014143251935393834343731
KD0107	Damari	0.011943842549522194295368	0.013327767902036671922159
12203	Damasak	0.013530499906981128373126	0.015012523521921536588865
70303	Damaturu Central	0.0140247416060810746667137210615471	0.0147556073864426797944664031620553
KD1502	Damau	0.010658695654149345676393	0.012339359949395654157927
KN0404	Damau	0.013183531805877686831412	0.013988762305704801878232
60802	Damba	0.012144553864518081274856	0.014772644824783584862176
51312	Damba Bakoshi	0.015076839170744220056912	0.015718675289947295009721
BA0403	Dambam A	0.014692309867646041810465	0.015377030561192919451544
BA0410	Dambam B	0.014770414317728270582212	0.015093542068083254357519
KN0802	Dambatta East	0.014750390556890249339133	0.014822384699208616574167
KN0803	Dambatta West	0.014688591754335792392533	0.014750473977701595810017
KD2302	Dambo	0.013131080789728466584389	0.013980773329131616480659
10703	Damboa	0.012587935761769046059515	0.013144461720330422439610
TRSBBB01	Dampar 1	0.012920020349706798746114	0.014531149663947282326425
TRSBBB02	Dampar 2	0.009978746656997134206366	0.010801639421664216126403
TRSBBB03	Dampar 3	0.011010711710753816557343	0.011773078793700594240249
80206	Damri	0.013986280459777531688372	0.014578637204956723476533
BA0106	Dan	0.011510047151608630300971	0.013672730758288954673637
KN2102	Dan Agundi	0.015783546794755695658590	0.013635594351171054394699
KD1702	Dan Alhaji	0.012070352103186100395734	0.013056262157594312080778
40304	Dan Alhaji Yangayya	0.014724438889093194051810	0.016468760047092074310437
40901	Dan Ali	0.014168755257909666246272	0.015362307048249951227848
JI0903	Dan Ama	0.014459628532869752383704	0.015590796237386993170370
BA0201	Dan Amar A	0.015733758056332480225998	0.015933390429652927966015
BA0202	Dan Amar B	0.015829573485749146102999	0.016373855441867913862479
41101	Dan Aunai	0.014044334711110132907908	0.015601918644460523998768
KD1801	Dan Damisa	0.013129608477576736914847	0.014020245735287581632254
BA0206	Dan Dango	0.013132131143574312651750	0.014203967186549714021653
KN2702	Dan Hassan	0.013327905741665414918887	0.013942677902217148368937
BA0211	Dan Iya	0.015356673778975337059311	0.015623504211018776848343
BA0213	Dan Kade	0.013975519327853940160035	0.014357581941228645392734
KN2504	Dan Maliki	0.015770259084269459209608	0.014873536543520581254388
41902	Dan Murabu	0.014137344865370298075145	0.015272231892393618545576
40904	Dan Musa A	0.014732237869629447825459	0.015389330048457980523622
40905	Dan Musa B	0.014668725940447607006294	0.016945832605564421823721
51903	Dan Umaru Mairairai	0.012095855334307824233773	0.014500334623862311110459
80802	Dan' Isa	0.015311888940649889058297	0.017350478346783568727451
ADSJAD01	Danaba	0.014232600033813758339834	0.015676233109220469450062
70201	Danani Lawanti	0.0099146234595835419980835396178484	0.0115124354654639669366319182065057
KN0902	Danbagina	0.013418389464281721714144	0.015378130125350711888998
KN2503	Danbare	0.016012029704875948777618	0.015218043498851527391697
PLSWAS02	Danburan	0.014769100279856341195678	0.015569557982100486202881
60205	Danchadi	0.014230898061255690538872	0.015168317005790015487537
71408	Danchuwa	0.013182134569406219209281	0.014169983089337062168101
KN1801	Dandago	0.014561229457457582382271	0.013687858254580541908587
40206	Dandagoro	0.014966394438316302759985	0.015200553792129984917971
51806	Dandane	0.015845848151679958942347	0.016782764071047887524365
NISSRP02	Dandaudu	0.011696594180734948137937	0.013930777531332983366058
JI1704	Dandi	0.012196145528996044150823	0.014970117019401060559818
61401	Dandin Mahe	0.014940407709440888980593	0.015384705378947167501434
40902	Dandire A	0.013763144719449135003903	0.015642844407007804826976
40903	Dandire B	0.012373744554093414637452	0.013755412894649864022748
51807	Dandiya Shema	0.014314195489259166512132	0.016041380601417580618664
40701	Dandume A	0.013869885104222917701859	0.013942010543956223986941
40702	Dandume B	0.012799616756205321009274	0.013751640291440600260618
41403	Dandutse	0.014182948628277495536293	0.014634303127063667968288
43301	Daneji A	0.014095922053334900021294	0.015206466279199652819944
43302	Daneji B	0.014460776632435670623240	0.015965984066435814027020
80303	Danfani Sabon Birni	0.015177677789940386228842	0.016639207162616127030373
KN0302	Dangada	0.013167029831142187088739	0.014080330875349722410831
50602	Dangaladima	0.014582870021599565214413	0.014398516510712182122096
80103	Dangaladima	0.014038875225554481964254	0.014597143633626882917736
51102	Dangamaji	0.013966611140469608000000	0.01624351425765528000000
42901	Dangani	0.014985155430780604566250	0.016429006867041417634818
60302	Dange	0.015280803453843837050811	0.015367819264263402216747
BA1613	Dango	0.014556541634503465782418	0.016214119964148963504419
51202	Dangoma Gayi	0.013081663670806574733245	0.014316128328448381091348
KN2404	Dangora	0.013825053738287464571629	0.014881015709384561553371
KN1001	Danguguwa	0.014330170851680259127933	0.015079408075862349668255
62001	Dangulbi	0.013436101779688433192593	0.014002933000708539977763
81003	Dangulbi	0.013472621970852754883918	0.014983578909683925628193
NISSRP03	Dangunu	0.013762612610224953814693	0.015092175153422073391696
KD1802	Danguziri	0.013652741301411228397474	0.014109466210672156860860
JI0403	Dangwaleri	0.012856258154257541247353	0.013575514514619449360924
JI2503	Dangwanki	0.012870931294212385648043	0.014670546059140571578230
JI2201	Dangyatin	0.013534775780642509555684	0.014559054599274635481823
40802	Danja A	0.013592497750050242065738	0.014140885971185220778484
40803	Danja B	0.013535761843364034905484	0.013932187222634481623200
42902	Danjanku-Karachi	0.013538547816191214641844	0.014557958254156103633570
81303	Danjibga	0.013267374455007075153939	0.014434158976526420231521
41803	Dankaba	0.0150933473986784317836575875486381	0.0166073918303260103669260700389105
80202	Dankadu	0.013626587457102460844285	0.014704620187606098836948
41804	Dankama	0.0137400483781187115454993298813554	0.0154232940020046170720959058811631
KN4403	Dankaza	0.013719995045281364456054	0.014314260043371886695581
51904	Danko Maga	0.012485355044174817962739	0.014022882492759493860317
51602	Dankolo	0.012405860963994476277061	0.014498605158886358681015
40403	Dankum	0.012416623634493542575448	0.015356845959932907104859
TRSYRR01	Dankum	0.013850991867219784876953	0.013512524722887631957128
JI2002	Dankumbo	0.013876835023684165961135	0.015243831990114376301680
81004	Dankurmi	0.012046905511830253375158	0.014662807520227989089542
JI2504	Danladi	0.013356971737108590104287	0.015246915632053285389735
KN4302	Danlasan	0.013078864190789463000000	0.015222312661407635000000
KD0301	Danmahawayi	0.011267686075490783647327	0.012775762615261002038286
80207	Danmanau	0.012385234089179225329087	0.013381860941767840254622
NISRJA01	Danragi	0.014118678181285646361970	0.015128894815347632747580
81005	Dansadau	0.013620584181036047110208	0.015241841651243223755523
42502	Dansarai	0.014135739722124698916833	0.015462589958356960643485
40703	Dansoda	0.013033160046386059099146	0.013957419287874130679438
KN2405	Dansoshiya	0.013953429158145000043003	0.015085210659737110237966
JI2403	Dansure	0.012465050788115273827015	0.014098039774022394401436
40704	Dantankari	0.012950905152052616696579	0.014007523774340192277061
JI0904	Dantanoma	0.014855596958459992940507	0.014692632307202617232464
PLSRYM03	Danto	0.014917592954392039338302	0.015690614467245655488145
41701	Dantutture	0.013372501323502499132810	0.013909503450241676047053
50105	Danwarai	0.01568292190985122000000	0.016115864058124322000000
KD2101	Danwata	0.011095201163780323972369	0.013185279733350035192945
42403	Danyashe	0.015192883441146326844191	0.016087709318263115355342
KN0503	Danzabuwa	0.013391618510292328239905	0.014414324543640283032595
JI2505	Danzomo	0.013741517241648869875423	0.015214403325795337868831
70205	Dapchi	0.0121771750410245428073737279007026	0.0140277909179379302030849823719739
41503	Dara	0.014874959314453111647471	0.016287948379234403295006
BA0501	Darazo East	0.015037182268853934887701	0.015877415874575356342246
BA0512	Darazo West	0.015393552272819117545758	0.015850467688735873696667
43401	Dargage	0.013768146526448026482370	0.015261238101817571282133
60201	Darhela Badau	0.015353753536530547489217	0.015700892240352864287174
NASGRU04	Dari	0.012846513674328445967387	0.013986035387413476733803
71211	Darin Langawa	0.011954384721194613000000	0.014201111065159991000000
JI1203	Darina	0.013872462192667206683857	0.015236837880300451363229
40303	Darini Magaji Abu	0.014155139201441745597384	0.016026695376341696456839
KN4404	Darki	0.013380130013484756494801	0.013923959576232038320066
KN3802	Darmanawa	0.015506024007256336468499	0.014798625955065708293985
60803	Darna Sabon Gari	0.015125230512191792001104	0.016283952695688036086547
60811	Darna Tsolawo	0.014999607627693615522111	0.015557525852110012353940
TRSKLD03	Darofai	0.012905258554301696879873	0.014115123668739774364914
KN2406	Dashi	0.013231241414260251636331	0.013713003134553407938086
PLSBUU03	Dashonong	0.016368442647687850032714	0.015594613388533633601239
NISKUG03	Dassun	0.011834805212128315741555	0.013079847853655343109926
41301	Daudawa	0.012981931183880165270916	0.014151830968209595385657
81304	Dauki	0.014467201644821985558758	0.015670642544981811224545
41504	Daunaka	0.014603894103553236599670	0.016131119729294014902941
KN2201	Daura	0.012871680901722479768240	0.013708224243222869642823
70503	Daura A	0.011401206553771380729314	0.014446333502865649535425
70505	Daura B	0.013493146100640199000000	0.01592438875882789000000
81403	Dauran Birnin Tsaba	0.015069833959851620594640	0.017073889075657404657893
KN3803	Daurawa	0.016485184769672519054372	0.015399504704499762585314
NASNTT01	Dausu	0.013577437719130238554145	0.015313955171700318741284
JI1003	Dawa	0.013218846593945346239777	0.015817380877808446308550
40104	Dawa Musa	0.013050460490239762806211	0.013703509255233676887624
BA0212	Dawaki	0.015799268121072918803776	0.016010230505208183887436
GMSGME05	Dawaki	0.010257288497194116883646	0.012377525130630192679400
KD1404	Dawaki	0.011372322607749987693830	0.012804447824042509584451
KN0903	Dawaki	0.013290470871111231654643	0.013703833624304793594113
KN3201	Dawaki	0.013300910415340283502922	0.013696546211118984257598
PLSKWK05	Dawaki	0.01434509059297002228816	0.01507705194116266293890
KN1002	Dawaki East	0.012670994259546199139981	0.013938987560993718237296
KN1003	Dawaki West	0.013162073782279261247745	0.014210766770745608514226
KN0904	Dawakiji	0.013641864519794984618570	0.014444272887620544930852
KN3302	Dawakin Gulu	0.012782948540896084000000	0.013626685167270693000000
JI2703	Dawan Gawo	0.012411761280913016340865	0.014784956169246645622840
KN1004	Dawanau	0.015269442143153759947041	0.015409359131208219076585
71207	Dawasa	0.011774310768128274665011	0.013636191977911779136742
70104	Dawayo	0.013288080936465168820484	0.014996092075312164556713
ADSTNG01	Dawo 1	0.014262526790362991000000	0.01541378796070407000000
ADSTNG02	Dawo 2	0.012606700720442120021992	0.013026415470899381243208
42503	Dayi	0.014315159007633001420999	0.015034159430498305627885
NISSRP04	Daza	0.014083152662083702779766	0.015430517749088104809528
BA0307	Dazara	0.01384339001438119134635	0.01572767780681632082682
71208	Dazigau	0.011796141331014009401840	0.014144107765286193445620
GMSYDB01	Deba	0.011778404956425524083752	0.012666190470772068056393
71603	Degeltura	0.010642677480735171995007	0.013464044082580056308269
GMSBLG04	Degri	0.013748783403129161682952	0.015516212946829355351114
71209	Degubi	0.012250300371087996000000	0.013881985566332605000000
KGSKNA03	Dekina	0.014833771201785531961815	0.015385937546675038342212
71604	Dekwa	0.00994387874174458151163	0.01291125032803905909302
ADSDSA03	Demsa	0.013274264813155014133595	0.014619303387283362627547
PLSDNG02	Dengi	0.014335228622897596383882	0.014913581188126222593944
PLSSHD01	Derteng	0.013623896675305615286703	0.014273035171175107665544
RVSDEG01	Deward 1	0.013300429174880488982412	0.014277284236990650263819
RVSDEG10	Deward 10	0.01586047129978725000000	0.015605263260000501000000
RVSDEG11	Deward 11	0.01568292190985122000000	0.016115864058124322000000
RVSDEG12	Deward 12	0.015978837559744604000000	0.01624351425765528000000
RVSDEG13	Deward 13	0.013929497184734530440213	0.015123889721911004057573
RVSDEG14	Deward 14	0.012901314800853436000000	0.014201111065159991000000
RVSDEG15	Deward 15	0.015462713788603830162376	0.015363991744253379786139
RVSDEG16	Deward 16	0.015452934526073791077206	0.015846367267386635066176
RVSDEG17	Deward 17	0.014850071734080556303763	0.015981784420841568676542
RVSDEG02	Deward 2	0.014888010506169194898112	0.015319987090313325922422
RVSDEG03	Deward 3	0.013315596710704168000000	0.01452023656398738000000
RVSDEG04	Deward 4	0.013081118786217223742857	0.014446685734733831285714
RVSDEG06	Deward 6	0.014144160530405635000000	0.015541438160235024000000
RVSDEG07	Deward 7	0.016268756178085660745529	0.016642085412360991877971
RVSDEG09	Deward 9	0.016183772226198042582379	0.016412816860095297375566
BA1305	Dewu	0.011678581444163066782730	0.013656019823151762324234
TRSKRM08	Didan	0.012546216020981375000000	0.014073460865629037000000
BA1013	Diga	0.013798426913395496610832	0.014346536102146281419242
51203	Diggi	0.01595128888475111259057	0.016140425596858407276828
ADSMUB03	Digil	0.014657938555417150959018	0.01509307886043486856355
JI0404	Diginsa	0.010710422651741257587457	0.011886501744752945233588
IMSDFB02	Dikenafai 1	0.015807358815338786546392	0.015978633319412720727774
50302	Dikko	0.015139366967571767571146	0.016350414992934413336957
NISGWU03	Diko	0.015756360873062667834026	0.015977652914311381398907
10803	Dikwa	0.015622151454685824910746	0.014745009560574325669826
71605	Dilala/Kalgi	0.00936588428598093165929	0.01172265565980502777882
10202	Dille Huyim	0.012434634415672152257985	0.013994590321903226605988
ADSDSA04	Dilli	0.013625762644925741691426	0.015206865816350042689086
IMSAMG13	Dim Na Nume	0.016118833602550338016532	0.015629981204530327769807
62204	Dimbiso	0.014693781342865423694789	0.014713647674210618315398
PLSTNK02	Din	0.012777689966943948558873	0.014617437764668120584520
62205	Dinawa	0.015472113988659162973343	0.015969958408588399494236
KN3901	Dindere	0.012906240601733646785093	0.014110645923753271300621
JI1102	Dingaya	0.013741052175598190596240	0.015087848744332022102327
TRSTZG03	Dingding	0.013765785458560257856707	0.014967012262345723000000
BA1502	Dingis	0.013009208749076940914277	0.014423214279403253981755
60210	Dingyadi	0.014282994890278504530116	0.015101238722159064664792
ENSGBO12	Diogbe/Umunko	0.015216224048374437550652	0.015789888724116486875627
10307	Dipchari	0.011800668682963538228430	0.014047947381871120654433
ADSGYL01	Dirbishi	0.015367738395299235289444	0.015557229960163679668296
ADSSNG01	Dirma	0.011562099477554269248798	0.013629544202230187796232
BA1604	Disina A	0.011871641904518502269809	0.014969696054152943504130
BA1614	Disina B	0.012194427069204616467732	0.015183151611456477129883
KN1802	Diso	0.015801288169808574000000	0.013116084369146873000000
42801	Dissi	0.014148695998893863510488	0.015273061857154303916407
TRSLAU02	Dobeli	0.013537344364641843789137	0.014582175458727839686102
FCTGWA02	Dobi	0.014164146339343934570863	0.015030892610489737474165
51003	Dodoru	0.015146725045616643929455	0.015512951465418739624816
KD1904	Dogarawa	0.013918953875917652963918	0.014504390536564969846400
71410	Dogo Tebo	0.014214600144506080141917	0.014644291640854151333577
11403	Dogoma Jalori	0.011717652201279908000000	0.01369051026703617000000
61804	Dogon Daji	0.014390561082832491963505	0.014949048049935766060078
BA1105	Dogon Jeji A	0.012944518485737868934000	0.013754718317400240776000
BA1106	Dogon Jeji B	0.013314670082714039670983	0.013711532468593444689792
BA1107	Dogon Jeji C	0.013318922704785614254545	0.014554839262703210909091
KN1102	Dogon Kawo	0.013240681814077401729217	0.013891718636729460968051
NISWSE01	Dogon Kurumi	0.015773644618157171891665	0.016115556052924174785267
KN0704	Dogon Nama	0.016255966863399939392116	0.014883192162446248682573
71401	Dogon Nini	0.013620426070477824379831	0.013397655389908645980482
KD0108	Dogondawa	0.013191835082747063262239	0.014310277379559545108593
11705	Dogoshi	0.010533989601706383000000	0.013307559668443304000000
42702	Doguru A	0.015008279329548146292125	0.017626481491354324770110
42703	Doguru B	0.014652628164251007397143	0.017607183103501684220000
BA0903	Doguwa	0.014931221389167374917197	0.015780072477846710227816
KN1103	Doguwa	0.013152541981530514703133	0.013710681609516750247225
GMSKWM03	Doho	0.013457577914150549781404	0.014987252364795983158251
40603	Doka	0.014519186559692031440981	0.015398504471539049967368
KD1601	Doka	0.013066772556692488569155	0.013402369241256656558186
KN3902	Doka	0.013710418103022410972160	0.014209563448575135151994
NASDMA04	Doka	0.013692715198205688599458	0.015160105305454737046206
51603	Doka Bere	0.012487623123947842112460	0.013234351225480311807533
KN3303	Doka Dawa	0.013444075670131179709731	0.013681930189710772613513
PLSQAP03	Doka East	0.013601830864802528717305	0.015054911370786914121909
PLSQAP04	Doka West	0.013855444467148169277657	0.014119956128027044572115
PLSSHD02	Dokka	0.013494537302898474042576	0.014723948913046325710146
JI0802	Doko	0.013619632064785278997757	0.015380073992117668589159
NISKUG04	Doko	0.010773387149989156514003	0.012612949109875355201538
NISBDA03	Dokoza	0.014494592540171848905018	0.015386679450588624046595
PLSPKN03	Dokpai	0.013389962080316482184400	0.014533499874101044094347
70805	Dokshi	0.008842583897046844991742	0.010360479315663944308117
KD0805	Dokwa	0.013460566044833223343822	0.014910572420827383094816
71106	Dole	0.011686188113719763534716	0.013013945884870081457305
81401	Dole	0.014443576326167080068875	0.015333299265027717718383
50803	Dolekaina	0.013982810563055002834110	0.016069508966501849713378
TRSLAU03	Donadda	0.013667822211712313633317	0.015081998536424582464417
ADSDSA05	Dong	0.012208484668814739211504	0.013936431515665629892317
11404	Dongo	0.009113594482218153000000	0.01228635807219566000000
LASAGG03	Dopemu	0.014024249194410248371169	0.013127241083521312419977
JI0203	Dorawa	0.011910095880917628933422	0.014813781030818219938748
KN1503	Dorawar Sallau	0.014349368705147527632027	0.014884104323833965982975
KN1803	Dorayi	0.016571051036913024024523	0.015093079753867520213079
11706	Doro	0.014133533879655618214565	0.015018597963657415688221
40504	Doro	0.015524690013072556406281	0.015960924367751857194480
KN0905	Dosan	0.014209962138722128738670	0.015060063923392862971748
80902	Dosara Birnin Kaya	0.013658765024163719965112	0.014673391373560927330350
BA0606	Dott	0.014608550645798706937117	0.015592570178693538968860
ADSYLN03	Doubeli	0.01503190748008578000000	0.014903187162580246000000
PLSBUU04	Du A	0.015272952892307195112081	0.015673036244546265548697
PLSBUU05	Du B	0.015357448015657018751871	0.015474218920049035670918
ADSLMR01	Dubange	0.013019681060810789000000	0.014201111065159991000000
JI1302	Dubantu	0.015377049699557291561090	0.013872867694937535458647
71206	Duddaye	0.010264456224267611255183	0.013140243577564213274322
42303	Duddunni	0.013855526217079535792653	0.014938311429837282109532
NASNBB04	Duduguru	0.014736367127704516119020792765027	0.015747902277716839785125008793872
KN2001	Dugabau	0.013060768711576383262026	0.013503342087525310485255
NISRJA02	Dugge	0.011244187161450498000000	0.01400963576586356000000
10502	Dugja	0.014668617010327974303468	0.015110397340305314212128
43101	Dugu Muazu	0.011887937327915745972082	0.013191687640902432364425
51703	Dugu Tsoho	0.014199210747595701024979	0.015697159468321882682489
PLSDNG03	Dugub	0.013552329230618873000000	0.01592438875882789000000
41505	Dugul	0.015217672217845395489289	0.016583911327026989759070
KN3304	Dugurawa	0.013554392195939261668305	0.013958968704167959053736
ADSMDG02	Duhu	0.014601300520468487582377	0.015452194241021904895620
KN0204	Duja	0.013762836012070665089046	0.015222312661407635000000
12205	Duji	0.011842474854838757422047	0.013515152432797561813735
[truncated: 6,962 more rows]
