# Supplementary material for: Effectiveness of Using AI Driven Hotspot Mapping for Active Case Finding of Tuberculosis in South-Western Nigeria
Source: Preprints.org preprint supplement (doi:10.20944/preprints202403.0091.v2), 2024-03-28
Supplement: Supplementary file 4 [file SupplementaryData2.xlsx]

## Sheet: pearsons correlation
var1	var2	pearson	pvalue
ci95_inference_mid_bactdiagnosedtotnormc	evaluated_tot_norm_f	0.72659	0
ci95_inference_mid_bactdiagnosedtotnormc	presumptives_tot_norm_f	0.718825	0
ci95_inference_mid_bactdiagnosedtotnormc	evaluated_tot_norm_c	0.627435	0
ci95_inference_mid_bactdiagnosedtotnormc	presumptives_tot_norm_c	0.624989	0
af_diagnosed_tot_norm_f	ci95_inference_mid_bactdiagnosedtotnormc	0.412872	4.80104e-154
bact_diagnosed_tot_norm_f	ci95_inference_mid_bactdiagnosedtotnormc	0.388185	6.46854e-135
af_diagnosed_tot_norm_c	ci95_inference_mid_bactdiagnosedtotnormc	0.376164	1.94936e-138
bact_diagnosed_tot_norm_c	ci95_inference_mid_bactdiagnosedtotnormc	0.348974	3.95436e-118
ci95_inference_mid_bactdiagnosedtotnormc	hiv_prev	0.121023	0
ci95_inference_mid_bactdiagnosedtotnormc	screened_tot_ci	0.120714	9.37374e-05
bact_diagnosed_tot_norm_ci	ci95_inference_mid_bactdiagnosedtotnormc	0.103103	0.000810922
ci95_inference_mid_bactdiagnosedtotnormc	lit_women	0.0835839	1.14341e-279
af_diagnosed_tot_norm_ci	ci95_inference_mid_bactdiagnosedtotnormc	0.0816264	0.00807809
ci95_inference_mid_bactdiagnosedtotnormc	dpt_3	0.0680365	8.47427e-186
ci95_inference_mid_bactdiagnosedtotnormc	dist_road	0.0504601	1.41245e-100
all_vacc	ci95_inference_mid_bactdiagnosedtotnormc	0.043506	4.98974e-77
ci95_inference_mid_bactdiagnosedtotnormc	water	0.0353463	1.88683e-51
ci95_inference_mid_bactdiagnosedtotnormc	lit_men	0.0346115	2.12089e-49
ci95_inference_mid_bactdiagnosedtotnormc	dpt_1	0.0287602	1.20507e-34
ci95_inference_mid_bactdiagnosedtotnormc	measles	0.0226737	3.74076e-22
ci95_inference_mid_bactdiagnosedtotnormc	tt_motor_hc	0.00421323	0.0746318
ci95_inference_mid_bactdiagnosedtotnormc	defecation	-0.0543946	2.17016e-119
ci95_inference_mid_bactdiagnosedtotnormc	pov	-0.0569678	4.00093e-128
child_st	ci95_inference_mid_bactdiagnosedtotnormc	-0.0581434	3.69728e-136
ci95_inference_mid_bactdiagnosedtotnormc	fac_cov	-0.0799324	1.71915e-16
ci95_inference_mid_bactdiagnosedtotnormc	elev	-0.086458	6.52547e-293
ci95_inference_mid_bactdiagnosedtotnormc	nightl	-0.0866913	2.89646e-288
ci95_inference_mid_bactdiagnosedtotnormc	mortality_under_5_norm	-0.128051	0
ci95_inference_mid_bactdiagnosedtotnormc	m_popdens	-0.1317	0
ci95_inference_mid_bactdiagnosedtotnormc	tot_popdens	-0.132296	0
ci95_inference_mid_bactdiagnosedtotnormc	plus_60_popdens	-0.132869	0
ci95_inference_mid_bactdiagnosedtotnormc	screened_tot_c	-0.25146	3.91292e-59
ci95_inference_mid_afdiagnosedtotnormc	ci95_inference_mid_bactdiagnosedtotnormc	-0.268489	0
ci95_inference_mid_bactdiagnosedtotnormc	screened_tot_f	-0.33517	1.78757e-98
_ci: contact investigation data

## Sheet: variable dictionary
Variable	Description	Source
ci95_inference_mid_bactdiagnosedtotnormc	Predicted b+ rate at community level	TBLON
af_diagnosed_tot_norm_f	Observed all forms diagnosed rate at facility level	TBLON
bact_diagnosed_tot_norm_f	Observed b+ diagnosed rate at facility level	TBLON
af_diagnosed_tot_norm_c	Observed all forms diagnosed rate at community level	TBLON
bact_diagnosed_tot_norm_c	Observed b+ diagnosed rate at community level	TBLON
bact_diagnosed_tot_norm_ci	Observed b+ diagnosed rate for contact investigation	TBLON
ci95_inference_mid_bactdiagnosedtotnormc
af_diagnosed_tot_norm_ci	Observed all forms diagnosed rate for contact investigation	TBLON
ci95_inference_mid_bactdiagnosedtotnormc
ci95_inference_mid_bactdiagnosedtotnormc
all_vacc	% Children with 8 basic vaccinations	DHS Spatial Data Repository
ci95_inference_mid_bactdiagnosedtotnormc
ci95_inference_mid_bactdiagnosedtotnormc
ci95_inference_mid_bactdiagnosedtotnormc
ci95_inference_mid_bactdiagnosedtotnormc
ci95_inference_mid_bactdiagnosedtotnormc
ci95_inference_mid_bactdiagnosedtotnormc
ci95_inference_mid_bactdiagnosedtotnormc
child_st	% Children stunted	DHS Spatial Data Repository
ci95_inference_mid_bactdiagnosedtotnormc
ci95_inference_mid_bactdiagnosedtotnormc
ci95_inference_mid_bactdiagnosedtotnormc
ci95_inference_mid_bactdiagnosedtotnormc
ci95_inference_mid_bactdiagnosedtotnormc
ci95_inference_mid_bactdiagnosedtotnormc
ci95_inference_mid_bactdiagnosedtotnormc
ci95_inference_mid_bactdiagnosedtotnormc
ci95_inference_mid_afdiagnosedtotnormc	Predicted all forms rate at community level	TBLON
ci95_inference_mid_bactdiagnosedtotnormc
evaluated_tot_norm_f	Observed evaluated rate at facility level	TBLON
presumptives_tot_norm_f	Observed presumptives rate at facility level	TBLON
evaluated_tot_norm_c	Observed evaluated rate at community level	TBLON
presumptives_tot_norm_c	Observed presumptives rate at community level	TBLON
ci95_inference_mid_bactdiagnosedtotnormc
ci95_inference_mid_bactdiagnosedtotnormc
ci95_inference_mid_bactdiagnosedtotnormc
ci95_inference_mid_bactdiagnosedtotnormc
hiv_prev	HIV prevalence	GHDx
screened_tot_ci	Observed total screened for contact investigation	TBLON
ci95_inference_mid_bactdiagnosedtotnormc
lit_women	% Literate women	DHS Spatial Data Repository
ci95_inference_mid_bactdiagnosedtotnormc
dpt_3	% Children with DPT 3 vaccination	DHS Spatial Data Repository
dist_road	Distance to major roads in km	Worldpop
ci95_inference_mid_bactdiagnosedtotnormc
water	% Access to clean water	DHS Spatial Data Repository
lit_men	% Literate men	DHS Spatial Data Repository
dpt_1	% Children with DPT 1 vaccination	DHS Spatial Data Repository
measles	% Children with measles vaccination	DHS Spatial Data Repository
tt_motor_hc	Motorised travel time to health care facility	Malaria Atlas
defecation	% Lacking sanitation services	DHS Spatial Data Repository
pov	Poverty	Worldpop
ci95_inference_mid_bactdiagnosedtotnormc
fac_cov	Facility coverage (# facilities / thiessen)	HDX
elev	Elevation above sea level in meters	Worldpop
nightl	Night lights in nanoWatts/cm2/sr	Worldpop
mortality_under_5_norm	Mortality rate for children under 5	GHDx
m_popdens	Male population density	Facebook
tot_popdens	Total population density	Facebook
plus_60_popdens	Population plus 60 density	Facebook
screened_tot_c	Observed total screened at community level	TBLON
ci95_inference_mid_bactdiagnosedtotnormc
screened_tot_f	Observed total screened at facility level	TBLON
